# Supplementary material
Source: HighWire-hosted journal article supplement (doi:10.1101/rna.055509.115)
Supplement: Supplemental_Table_S1.xlsx [file Supplemental_Table_S1.xlsx]

## Sheet: rice
Mapper	Mapper	TotalReads	CorrectlyMapped	IncorrectGenome	Incorrectmirs	Preci	Recall	F0.25
Oryza_sativa_mirbase21_21nt.art.fqbb.bbmap.bam.20	BBmap default	80400	28581	430	319	0.9907	0.3648	0.8999
Oryza_sativa_mirbase21_21nt.art.fqbb.bbmap.k8.bam.20	BBmap k=8	80400	36348	750	525	0.9841	0.4679	0.9242
Oryza_sativa_mirbase21_21nt.art.fqbb.bbmap.k10.bam.20	BBmap k=10	80400	27428	390	301	0.9914	0.3497	0.8948
Oryza_sativa_mirbase21_21nt.art.fqbb.bbmap.k12.bam.20	BBmap k=12	80400	26745	369	282	0.9919	0.3407	0.8917
Oryza_sativa_mirbase21_21nt.art.fqbb.bbmap.k14.bam.20	BBmap k=14	80400	31295	563	336	0.9888	0.4004	0.9101
Oryza_sativa_mirbase21_21nt.art.fq.gnumap.j10.mer10.bam.20	GNUmap j10 mer10 (default)	80400	41627	1001	593	0.9802	0.5376	0.9349
Oryza_sativa_mirbase21_21nt.art.fq.gnumap.j2.mer10.bam.20	GNUmap j2 mer10	80400	42517	991	503	0.9814	0.5474	0.9377
Oryza_sativa_mirbase21_21nt.art.fq.gnumap.j2.mer6.bam.20	GNUmap j2 mer6	80400	43429	829	491	0.9836	0.5566	0.9411
Oryza_sativa_mirbase21_21nt.art.fq.gnumap.j2.mer8.bam.20	GNUmap j2 mer8	80400	43412	829	508	0.9834	0.5566	0.9409
Oryza_sativa_mirbase21_21nt.art.fq.gnumap.j3.mer10.bam.20	GNUmap j3 mer10	80400	42059	1082	540	0.9798	0.5433	0.9356
Oryza_sativa_mirbase21_21nt.art.fq.gnumap.j3.mer6.bam.20	GNUmap j3 mer6	80400	43406	829	514	0.9833	0.5566	0.9409
Oryza_sativa_mirbase21_21nt.art.fq.gnumap.j3.mer8.bam.20	GNUmap j3 mer8	80400	43417	829	503	0.9834	0.5566	0.941
Oryza_sativa_mirbase21_21nt.art.fq.gnumap.j5.mer10.bam.20	GNUmap j5 mer10	80400	41622	1130	555	0.979	0.5386	0.9341
Oryza_sativa_mirbase21_21nt.art.fq.gnumap.j5.mer6.bam.20	GNUmap j5 mer6	80400	42984	910	547	0.9819	0.5527	0.939
Oryza_sativa_mirbase21_21nt.art.fq.gnumap.j5.mer8.bam.20	GNUmap j5 mer8	80400	42116	1059	595	0.9794	0.5444	0.9355
Oryza_sativa_mirbase21_21nt.art.fqmos.mosaic.hs9.bam.20	Mosaik hs9	80400	10093	2135	1098	0.9598	0.1657	0.7488
Oryza_sativa_mirbase21_21nt.art.fqmos.mosaic.hs11.bam.20	Mosaik hs11	80400	43126	1562	676	0.9722	0.5642	0.9325
Oryza_sativa_mirbase21_21nt.art.fqmos.mosaic.hs13.bam.20	Mosaik hs13	80400	33347	1627	509	0.9734	0.4413	0.909
Oryza_sativa_mirbase21_21nt.art.fqmos.mosaic.hs15.bam.20	Mosaik hs15 (default)	80400	27611	1553	386	0.9759	0.3675	0.8893
Oryza_sativa_mirbase21_21nt.art.fqsm.smalt.k8.s1.bam.20	Smalt k8 s1	80400	46884	2098	714	0.965	0.6181	0.9342
Oryza_sativa_mirbase21_21nt.art.fqsm.smalt.k8.s2.bam.20	Smalt k8 s2	80400	47485	2650	882	0.9561	0.6345	0.9284
Oryza_sativa_mirbase21_21nt.art.fqsm.smalt.k8.s3.bam.20	Smalt k8 s3	80400	46586	3200	947	0.9484	0.631	0.9212
Oryza_sativa_mirbase21_21nt.art.fqsm.smalt.k10.s1.bam.20	Smalt k10 s1	80400	51485	2285	747	0.9623	0.6781	0.9391
Oryza_sativa_mirbase21_21nt.art.fqsm.smalt.k10.s2.bam.20	Smalt k10 s2	80400	51335	2186	769	0.9632	0.6752	0.9397
Oryza_sativa_mirbase21_21nt.art.fqsm.smalt.k10.s3.bam.20	Smalt k10 s3	80400	50324	2223	799	0.9624	0.6635	0.9376
Oryza_sativa_mirbase21_21nt.art.fqsm.smalt.k12.s1.bam.20	Smalt k12 s1	80400	51149	2260	748	0.9626	0.6736	0.9389
Oryza_sativa_mirbase21_21nt.art.fqsm.smalt.k12.s2.bam.20	Smalt k12 s2	80400	51274	2153	758	0.9638	0.6739	0.94
Oryza_sativa_mirbase21_21nt.art.fqsm.smalt.k12.s3.bam.20	Smalt k12 s3	80400	50833	2143	790	0.9635	0.6687	0.9392
Oryza_sativa_mirbase21_21nt.art.fqsm.smalt.k14.s1.bam.20	Smalt k14 s1	80400	49879	2221	740	0.963172	0.657214	0.937499
Oryza_sativa_mirbase21_21nt.art.fqsm.smalt.k14.s2.bam.20	Smalt k14 s2	80400	49344	2168	749	0.963719	0.650012	0.937115
Oryza_sativa_mirbase21_21nt.art.fqsm.smalt.k14.s3.bam.20	Smalt k14 s3	80400	48894	2227	748	0.962998	0.645137	0.935874
Oryza_sativa_mirbase21_21nt.art.fqmr.razers.sl14.se.pa.out	MicroRazers sl14 pa	80400	47496	8914	1111	0.8753	0.7154	0.864
Oryza_sativa_mirbase21_21nt.art.fqmr.razers.sl16.se.pa.out	MicroRazers sl16 pa	80400	53224	5245	1248	0.9192	0.7427	0.9066
Oryza_sativa_mirbase21_21nt.art.fqmr.razers.sl18.se.pa.out	MicroRazers sl18 pa	80400	55020	2785	1281	0.9494	0.7349	0.9334
Oryza_sativa_mirbase21_21nt.art.fqmr.razers.sl20.se.pa.out	MicroRazers sl20 pa	80400	55045	1618	1272	0.9641	0.7206	0.9453

## Sheet: man
Mapper	Mapper	TotalReads	CorrectlyMapped	IncorrectGenome	Incorrectmirs	Preci	Recall	F0.25
Homo_sapiens_mirbase21.fa_21nt.art.fqbb.bbmap.bam.20	BBmap default	128980	22527	24	559	0.99548	0.179175	0.785082
Homo_sapiens_mirbase21.fa_21nt.art.fqbb.bbmap.k10.bam.20	BBmap k=10	128980	20942	66	538	0.995317	0.167049	0.770572
Homo_sapiens_mirbase21.fa_21nt.art.fqbb.bbmap.k12.bam.20	BBmap k=12	128980	19776	20	495	0.996007	0.157319	0.758229
Homo_sapiens_mirbase21.fa_21nt.art.fqbb.bbmap.k14.bam.20	BBmap k=14	128980	28072	59	711	0.99403	0.223616	0.826525
Homo_sapiens_mirbase21.fa_21nt.art.fqbb.bbmap.k8.bam.20	BBmap k=8	128980	53665	641	1554	0.982982	0.43309	0.914667
Homo_sapiens_mirbase21.fa_21nt.art.fq.gnumap.j10.mer10.bam.20	GNUmap j10 mer10 (default)	128629	73410	1514	2376	0.96984	0.599318	0.935808
Homo_sapiens_mirbase21.fa_21nt.art.fq.gnumap.j10.mer6.bam.20	GNUmap j2 mer6	128629	73485	1514	2301	0.970422	0.599318	0.936317
Homo_sapiens_mirbase21.fa_21nt.art.fq.gnumap.j10.mer8.bam.20	GNUmap j2 mer8	128629	73491	1514	2295	0.970468	0.599318	0.936358
Homo_sapiens_mirbase21.fa_21nt.art.fq.gnumap.j3.mer10.bam.20	GNUmap j2 mer10	133750	74334	448	1974	0.981222	0.5951	0.945149
Homo_sapiens_mirbase21.fa_21nt.art.fq.gnumap.j3.mer6.bam.20	GNUmap j3 mer6	133750	74291	448	2017	0.980889	0.5951	0.944857
Homo_sapiens_mirbase21.fa_21nt.art.fq.gnumap.j3.mer8.bam.20	GNUmap j3 mer8	133750	74284	448	2024	0.980834	0.5951	0.94481
Homo_sapiens_mirbase21.fa_21nt.art.fqmos.mosaic.hs11.bam.20	Mosaik hs11	128980	39655	2482	2366	0.962413	0.345038	0.870763
Homo_sapiens_mirbase21.fa_21nt.art.fqmos.mosaic.hs13.bam.20	Mosaik hs13	128980	78697	5161	2267	0.94241	0.667739	0.920145
Homo_sapiens_mirbase21.fa_21nt.art.fqmos.mosaic.hs15.bam.20	Mosaik hs15 (default)	128980	60700	6310	1762	0.937417	0.533199	0.897398
Homo_sapiens_mirbase21.fa_21nt.art.fqmos.mosaic.hs9.bam.20	Mosaik hs9	128980	1464	750	230	0.992402	0.0189487	0.246746
Homo_sapiens_mirbase21.fa_21nt.art.fqsm.smalt.k10.s1.bam.20	Smalt k10 s1	128980	86026	5763	2448	0.936339	0.730633	0.921084
Homo_sapiens_mirbase21.fa_21nt.art.fqsm.smalt.k10.s2.bam.20	Smalt k10 s2	128980	86655	5582	2513	0.937238	0.73461	0.922274
Homo_sapiens_mirbase21.fa_21nt.art.fqsm.smalt.k10.s3.bam.20	Smalt k10 s3	128980	85235	5933	2499	0.934626	0.726213	0.91911
Homo_sapiens_mirbase21.fa_21nt.art.fqsm.smalt.k12.s1.bam.20	Smalt k12 s1	128980	87274	5178	2482	0.940611	0.736037	0.92548
Homo_sapiens_mirbase21.fa_21nt.art.fqsm.smalt.k12.s2.bam.20	Smalt k12 s2	128980	86947	4888	2512	0.942627	0.731486	0.926889
Homo_sapiens_mirbase21.fa_21nt.art.fqsm.smalt.k12.s3.bam.20	Smalt k12 s3	128980	86088	5229	2491	0.940146	0.727307	0.924236
Homo_sapiens_mirbase21.fa_21nt.art.fqsm.smalt.k14.s1.bam.20	Smalt k14 s1	128980	86568	5163	2464	0.940867	0.730307	0.925176
Homo_sapiens_mirbase21.fa_21nt.art.fqsm.smalt.k14.s2.bam.20	Smalt k14 s2	128980	86024	4947	2410	0.94296	0.723996	0.926478
Homo_sapiens_mirbase21.fa_21nt.art.fqsm.smalt.k14.s3.bam.20	Smalt k14 s3	128980	85378	5158	2391	0.941472	0.720476	0.924785
Homo_sapiens_mirbase21.fa_21nt.art.fqsm.smalt.k16.s1.bam.20	Smalt k16 s1	128980	85316	5158	2453	0.940991	0.720476	0.924349
Homo_sapiens_mirbase21.fa_21nt.art.fqsm.smalt.k16.s2.bam.20	Smalt k16 s2	128980	83361	6224	2401	0.933129	0.71318	0.916502
Homo_sapiens_mirbase21.fa_21nt.art.fqsm.smalt.k16.s3.bam.20	Smalt k16 s3	128980	81915	3447	2408	0.954605	0.680493	0.93251
Homo_sapiens_mirbase21.fa_21nt.art.fqsm.smalt.k18.s1.bam.20	Smalt k18 s1	128980	81942	3447	2381	0.954815	0.680493	0.932698
Homo_sapiens_mirbase21.fa_21nt.art.fqsm.smalt.k18.s2.bam.20	Smalt k18 s2	128980	77894	1100	2206	0.974368	0.629555	0.943956
Homo_sapiens_mirbase21.fa_21nt.art.fqsm.smalt.k18.s3.bam.20	Smalt k18 s3	128980	76515	420	2143	0.980129	0.613103	0.946789
Homo_sapiens_mirbase21.fa_21nt.art.fqsm.smalt.k8.s1.bam.20	Smalt k8 s1	128980	22096	920	689	0.987525	0.183788	0.785467
Homo_sapiens_mirbase21.fa_21nt.art.fqsm.smalt.k8.s2.bam.20	Smalt k8 s2	128980	20621	1586	925	0.980532	0.179346	0.776486
Homo_sapiens_mirbase21.fa_21nt.art.fqsm.smalt.k8.s3.bam.20	Smalt k8 s3	128980	19294	2760	1002	0.970833	0.178756	0.770105
Homo_sapiens_mirbase21.fa_21nt.art.fqmr.razers.sl14.se.pa.out	MicroRazers sl14 pa	128980	83154	14112	4489	0.855784	0.788921	0.851539
Homo_sapiens_mirbase21.fa_21nt.art.fqmr.razers.sl16.se.pa.out	MicroRazers sl16 pa	128980	88447	12237	4769	0.86815	0.817592	0.865004
Homo_sapiens_mirbase21.fa_21nt.art.fqmr.razers.sl18.se.pa.out	MicroRazers sl18 pa	128980	96822	5691	5255	0.915134	0.83554	0.910035
Homo_sapiens_mirbase21.fa_21nt.art.fqmr.razers.sl20.se.pa.out	MicroRazers sl20 pa	128980	98327	1781	5343	0.944767	0.817576	0.936199
