# Supplementary material
Source: HighWire-hosted journal article supplement (doi:10.1101/rna.055509.115)
Supplement: Supplemental_Table_S2.xlsx [file Supplemental_Table_S2.xlsx]

## Sheet: ricemapQ
BamFile	Mapper	MapQ threshold	Precision	Recall	F0.25
Oryza_sativa_mirbase21_21nt.art.fqbb.bbmap.bam.10	BBMap.df	10	0.988868	0.411505	0.913477
Oryza_sativa_mirbase21_21nt.art.fqbb.bbmap.bam.5	BBMap.df	5	0.988582	0.411716	0.913308
Oryza_sativa_mirbase21_21nt.art.fqbb.bbmap.bam.4	BBMap.df	4	0.988396	0.411716	0.913158
Oryza_sativa_mirbase21_21nt.art.fqbb.bbmap.bam.15	BBMap.df	15	0.989726	0.385709	0.906246
Oryza_sativa_mirbase21_21nt.art.fqbb.bbmap.bam.20	BBMap.df	20	0.990808	0.364801	0.899964
Oryza_sativa_mirbase21_21nt.art.fqbb.bbmap.bam.25	BBMap.df	25	0.991381	0.342886	0.892129
Oryza_sativa_mirbase21_21nt.art.fqbb.bbmap.bam.30	BBMap.df	30	0.99245	0.301679	0.874643
Oryza_sativa_mirbase21_21nt.art.fqbb.bbmap.bam.3	BBMap.df	3	0.823383	0.655709	0.811181
Oryza_sativa_mirbase21_21nt.art.fqbb.bbmap.bam.2	BBMap.df	2	0.761007	0.737077	0.759557
Oryza_sativa_mirbase21_21nt.art.fqbb.bbmap.bam.1	BBMap.df	1	0.73648	0.981692	0.747463
Oryza_sativa_mirbase21_21nt.art.fqbb.bbmap.bam.0	BBMap.df	0	0.736306	0.981692	0.747294
Oryza_sativa_mirbase21_21nt.art.fqbb.bbmap.k8.bam.10	BBMap.k8	10	0.982251	0.503109	0.930143
Oryza_sativa_mirbase21_21nt.art.fqbb.bbmap.k8.bam.5	BBMap.k8	5	0.982015	0.503719	0.930066
Oryza_sativa_mirbase21_21nt.art.fqbb.bbmap.k8.bam.4	BBMap.k8	4	0.981853	0.503719	0.92993
Oryza_sativa_mirbase21_21nt.art.fqbb.bbmap.k8.bam.15	BBMap.k8	15	0.982662	0.482002	0.926078
Oryza_sativa_mirbase21_21nt.art.fqbb.bbmap.k8.bam.20	BBMap.k8	20	0.98398	0.467948	0.924039
Oryza_sativa_mirbase21_21nt.art.fqbb.bbmap.k8.bam.25	BBMap.k8	25	0.984776	0.459055	0.922623
Oryza_sativa_mirbase21_21nt.art.fqbb.bbmap.k8.bam.30	BBMap.k8	30	0.985896	0.44255	0.919489
Oryza_sativa_mirbase21_21nt.art.fqbb.bbmap.k8.bam.3	BBMap.k8	3	0.817463	0.734789	0.812088
Oryza_sativa_mirbase21_21nt.art.fqbb.bbmap.k8.bam.2	BBMap.k8	2	0.730547	0.827363	0.735611
Oryza_sativa_mirbase21_21nt.art.fqbb.bbmap.k8.bam.0	BBMap.k8	0	0.699216	0.978744	0.711164
Oryza_sativa_mirbase21_21nt.art.fqbb.bbmap.k8.bam.1	BBMap.k8	1	0.699042	0.978744	0.710994
Oryza_sativa_mirbase21_21nt.art.fq.bowtie2.bam.25	Bowtie2.df	25	0.975585	0.689925	0.952389
Oryza_sativa_mirbase21_21nt.art.fq.bowtie2.bam.30	Bowtie2.df	30	0.975547	0.689925	0.952355
Oryza_sativa_mirbase21_21nt.art.fq.bowtie2.bam.15	Bowtie2.df	15	0.973781	0.702998	0.952206
Oryza_sativa_mirbase21_21nt.art.fq.bowtie2.bam.10	Bowtie2.df	10	0.97347	0.705547	0.9522
Oryza_sativa_mirbase21_21nt.art.fq.bowtie2.bam.20	Bowtie2.df	20	0.973669	0.702998	0.952105
Oryza_sativa_mirbase21_21nt.art.fq.bowtie2.bam.3	Bowtie2.df	3	0.972052	0.711592	0.951564
Oryza_sativa_mirbase21_21nt.art.fq.bowtie2.bam.4	Bowtie2.df	4	0.971953	0.711592	0.951474
Oryza_sativa_mirbase21_21nt.art.fq.bowtie2.bam.5	Bowtie2.df	5	0.971853	0.711592	0.951385
Oryza_sativa_mirbase21_21nt.art.fq.bowtie2.bam.2	Bowtie2.df	2	0.971803	0.711592	0.95134
Oryza_sativa_mirbase21_21nt.art.fq.bowtie2.bam.1	Bowtie2.df	1	0.79102	0.96046	0.799315
Oryza_sativa_mirbase21_21nt.art.fq.bowtie2.bam.0	Bowtie2.df	0	0.78949	0.962376	0.797922
Oryza_sativa_mirbase21_21nt.art.fq.bowtie2.bib.bam.30	Bowtie2.bib	30	0.975199	0.672848	0.950085
Oryza_sativa_mirbase21_21nt.art.fq.bowtie2.bib.bam.25	Bowtie2.bib	25	0.973532	0.678669	0.949272
Oryza_sativa_mirbase21_21nt.art.fq.bowtie2.bib.bam.20	Bowtie2.bib	20	0.970622	0.681741	0.947017
Oryza_sativa_mirbase21_21nt.art.fq.bowtie2.bib.bam.15	Bowtie2.bib	15	0.970249	0.684017	0.94694
Oryza_sativa_mirbase21_21nt.art.fq.bowtie2.bib.bam.3	Bowtie2.bib	3	0.969005	0.688383	0.946313
Oryza_sativa_mirbase21_21nt.art.fq.bowtie2.bib.bam.2	Bowtie2.bib	2	0.968794	0.68842	0.946127
Oryza_sativa_mirbase21_21nt.art.fq.bowtie2.bib.bam.4	Bowtie2.bib	4	0.968756	0.688383	0.946089
Oryza_sativa_mirbase21_21nt.art.fq.bowtie2.bib.bam.5	Bowtie2.bib	5	0.968607	0.688383	0.945955
Oryza_sativa_mirbase21_21nt.art.fq.bowtie2.bib.bam.10	Bowtie2.bib	10	0.968595	0.688333	0.945939
Oryza_sativa_mirbase21_21nt.art.fq.bowtie2.bib.bam.1	Bowtie2.bib	1	0.793619	0.928955	0.800479
Oryza_sativa_mirbase21_21nt.art.fq.bowtie2.bib.bam.0	Bowtie2.bib	0	0.791642	0.931219	0.798684
Oryza_sativa_mirbase21_21nt.art.fq.bowtie2.vs.bam.30	Bowtie2.vs	30	0.975808	0.689925	0.952589
Oryza_sativa_mirbase21_21nt.art.fq.bowtie2.vs.bam.25	Bowtie2.vs	25	0.975348	0.689925	0.952177
Oryza_sativa_mirbase21_21nt.art.fq.bowtie2.vs.bam.15	Bowtie2.vs	15	0.973607	0.702998	0.952049
Oryza_sativa_mirbase21_21nt.art.fq.bowtie2.vs.bam.20	Bowtie2.vs	20	0.973557	0.702998	0.952005
Oryza_sativa_mirbase21_21nt.art.fq.bowtie2.vs.bam.10	Bowtie2.vs	10	0.973085	0.705547	0.951853
Oryza_sativa_mirbase21_21nt.art.fq.bowtie2.vs.bam.5	Bowtie2.vs	5	0.972226	0.711592	0.951721
Oryza_sativa_mirbase21_21nt.art.fq.bowtie2.vs.bam.4	Bowtie2.vs	4	0.972214	0.711592	0.95171
Oryza_sativa_mirbase21_21nt.art.fq.bowtie2.vs.bam.2	Bowtie2.vs	2	0.971716	0.711592	0.951261
Oryza_sativa_mirbase21_21nt.art.fq.bowtie2.vs.bam.3	Bowtie2.vs	3	0.971679	0.711592	0.951228
Oryza_sativa_mirbase21_21nt.art.fq.bowtie2.vs.bam.1	Bowtie2.vs	1	0.790759	0.96046	0.799064
Oryza_sativa_mirbase21_21nt.art.fq.bowtie2.vs.bam.0	Bowtie2.vs	0	0.789502	0.962376	0.797934
Oryza_sativa_mirbase21_21nt.art.fq.bowtie2.vsl.bam.30	Bowtie2.vsl	30	0.9749	0.681542	0.950826
Oryza_sativa_mirbase21_21nt.art.fq.bowtie2.vsl.bam.25	Bowtie2.vsl	25	0.972998	0.685796	0.949605
Oryza_sativa_mirbase21_21nt.art.fq.bowtie2.vsl.bam.15	Bowtie2.vsl	15	0.972562	0.688085	0.949471
Oryza_sativa_mirbase21_21nt.art.fq.bowtie2.vsl.bam.20	Bowtie2.vsl	20	0.972587	0.686007	0.94926
Oryza_sativa_mirbase21_21nt.art.fq.bowtie2.vsl.bam.4	Bowtie2.vsl	4	0.970995	0.692164	0.948519
Oryza_sativa_mirbase21_21nt.art.fq.bowtie2.vsl.bam.2	Bowtie2.vsl	2	0.97097	0.692164	0.948496
Oryza_sativa_mirbase21_21nt.art.fq.bowtie2.vsl.bam.3	Bowtie2.vsl	3	0.970933	0.692164	0.948463
Oryza_sativa_mirbase21_21nt.art.fq.bowtie2.vsl.bam.10	Bowtie2.vsl	10	0.970871	0.692164	0.948407
Oryza_sativa_mirbase21_21nt.art.fq.bowtie2.vsl.bam.5	Bowtie2.vsl	5	0.970833	0.692164	0.948373
Oryza_sativa_mirbase21_21nt.art.fq.bowtie2.vsl.bam.1	Bowtie2.vsl	1	0.794689	0.93444	0.801742
Oryza_sativa_mirbase21_21nt.art.fq.bowtie2.vsl.bam.0	Bowtie2.vsl	0	0.792823	0.936294	0.800035
Oryza_sativa_mirbase21_21nt.art.fq.bwa.bam.10	BWA.df	10	0.97245	0.710137	0.95177
Oryza_sativa_mirbase21_21nt.art.fq.bwa.bam.5	BWA.df	5	0.971119	0.718507	0.951443
Oryza_sativa_mirbase21_21nt.art.fq.bwa.bam.4	BWA.df	4	0.97097	0.719229	0.951382
Oryza_sativa_mirbase21_21nt.art.fq.bwa.bam.15	BWA.df	15	0.974813	0.686443	0.951305
Oryza_sativa_mirbase21_21nt.art.fq.bwa.bam.1	BWA.df	1	0.970597	0.720473	0.951173
Oryza_sativa_mirbase21_21nt.art.fq.bwa.bam.3	BWA.df	3	0.970684	0.719639	0.951166
Oryza_sativa_mirbase21_21nt.art.fq.bwa.bam.2	BWA.df	2	0.970336	0.7199	0.950878
Oryza_sativa_mirbase21_21nt.art.fq.bwa.bam.20	BWA.df	20	0.97852	0.630236	0.947712
Oryza_sativa_mirbase21_21nt.art.fq.bwa.bam.25	BWA.df	25	0.984577	0.494677	0.930377
Oryza_sativa_mirbase21_21nt.art.fq.bwa.bam.30	BWA.df	30	0.987152	0.477587	0.928855
Oryza_sativa_mirbase21_21nt.art.fq.bwa.bam.0	BWA.df	0	0.769789	0.997052	0.78025
Oryza_sativa_mirbase21_21nt.art.fq.bwa.bib.bam.10	BWA.bib	10	0.97551	0.694677	0.952851
Oryza_sativa_mirbase21_21nt.art.fq.bwa.bib.bam.4	BWA.bib	4	0.974639	0.701443	0.95281
Oryza_sativa_mirbase21_21nt.art.fq.bwa.bib.bam.5	BWA.bib	5	0.97459	0.700896	0.952706
Oryza_sativa_mirbase21_21nt.art.fq.bwa.bib.bam.15	BWA.bib	15	0.977363	0.678408	0.952668
Oryza_sativa_mirbase21_21nt.art.fq.bwa.bib.bam.1	BWA.bib	1	0.974316	0.702475	0.952631
Oryza_sativa_mirbase21_21nt.art.fq.bwa.bib.bam.2	BWA.bib	2	0.974167	0.701978	0.952443
Oryza_sativa_mirbase21_21nt.art.fq.bwa.bib.bam.3	BWA.bib	3	0.974129	0.701741	0.952384
Oryza_sativa_mirbase21_21nt.art.fq.bwa.bib.bam.20	BWA.bib	20	0.97944	0.642002	0.950066
Oryza_sativa_mirbase21_21nt.art.fq.bwa.bib.bam.25	BWA.bib	25	0.983445	0.554515	0.940645
Oryza_sativa_mirbase21_21nt.art.fq.bwa.bib.bam.30	BWA.bib	30	0.990709	0.398433	0.911045
Oryza_sativa_mirbase21_21nt.art.fq.bwa.bib.bam.0	BWA.bib	0	0.78694	0.962376	0.79547
Oryza_sativa_mirbase21_21nt.art.fq.bwa.ng.bam.10	BWA.ng	10	0.973595	0.709154	0.952697
Oryza_sativa_mirbase21_21nt.art.fq.bwa.ng.bam.15	BWA.ng	15	0.976032	0.68546	0.952286
Oryza_sativa_mirbase21_21nt.art.fq.bwa.ng.bam.5	BWA.ng	5	0.972027	0.717525	0.952161
Oryza_sativa_mirbase21_21nt.art.fq.bwa.ng.bam.2	BWA.ng	2	0.971866	0.718918	0.952159
Oryza_sativa_mirbase21_21nt.art.fq.bwa.ng.bam.4	BWA.ng	4	0.971853	0.718246	0.952078
Oryza_sativa_mirbase21_21nt.art.fq.bwa.ng.bam.3	BWA.ng	3	0.971455	0.718657	0.951761
Oryza_sativa_mirbase21_21nt.art.fq.bwa.ng.bam.1	BWA.ng	1	0.971244	0.71949	0.951656
Oryza_sativa_mirbase21_21nt.art.fq.bwa.ng.bam.20	BWA.ng	20	0.979465	0.629254	0.948416
Oryza_sativa_mirbase21_21nt.art.fq.bwa.ng.bam.25	BWA.ng	25	0.985622	0.493731	0.931058
Oryza_sativa_mirbase21_21nt.art.fq.bwa.ng.bam.30	BWA.ng	30	0.98842	0.476642	0.929701
Oryza_sativa_mirbase21_21nt.art.fq.bwa.ng.bam.0	BWA.ng	0	0.770535	0.995659	0.780921
Oryza_sativa_mirbase21_21nt.art.fq.gem.bam.0	GEM.df	0	0.98107	0.546915	0.937302
Oryza_sativa_mirbase21_21nt.art.fq.gem.bam.2	GEM.df	2	0.980983	0.546915	0.937227
Oryza_sativa_mirbase21_21nt.art.fq.gem.bam.5	GEM.df	5	0.98097	0.546915	0.937216
Oryza_sativa_mirbase21_21nt.art.fq.gem.bam.4	GEM.df	4	0.980945	0.546915	0.937195
Oryza_sativa_mirbase21_21nt.art.fq.gem.bam.15	GEM.df	15	0.980858	0.546915	0.93712
Oryza_sativa_mirbase21_21nt.art.fq.gem.bam.20	GEM.df	20	0.980846	0.546915	0.93711
Oryza_sativa_mirbase21_21nt.art.fq.gem.bam.1	GEM.df	1	0.980684	0.546915	0.936971
Oryza_sativa_mirbase21_21nt.art.fq.gem.bam.25	GEM.df	25	0.980684	0.546915	0.936971
Oryza_sativa_mirbase21_21nt.art.fq.gem.bam.10	GEM.df	10	0.980634	0.546915	0.936928
Oryza_sativa_mirbase21_21nt.art.fq.gem.bam.3	GEM.df	3	0.980634	0.546915	0.936928
Oryza_sativa_mirbase21_21nt.art.fq.gem.bam.30	GEM.df	30	1	0	0
Oryza_sativa_mirbase21_21nt.art.fq.gem.mod.bam.0	GEM.mod	0	0.981169	0.546915	0.937387
Oryza_sativa_mirbase21_21nt.art.fq.gem.mod.bam.3	GEM.mod	3	0.981169	0.546915	0.937387
Oryza_sativa_mirbase21_21nt.art.fq.gem.mod.bam.1	GEM.mod	1	0.981107	0.546915	0.937334
Oryza_sativa_mirbase21_21nt.art.fq.gem.mod.bam.2	GEM.mod	2	0.981032	0.546915	0.93727
Oryza_sativa_mirbase21_21nt.art.fq.gem.mod.bam.4	GEM.mod	4	0.980983	0.546915	0.937227
Oryza_sativa_mirbase21_21nt.art.fq.gem.mod.bam.25	GEM.mod	25	0.980883	0.546915	0.937142
Oryza_sativa_mirbase21_21nt.art.fq.gem.mod.bam.5	GEM.mod	5	0.980858	0.546915	0.93712
Oryza_sativa_mirbase21_21nt.art.fq.gem.mod.bam.10	GEM.mod	10	0.980821	0.546915	0.937088
Oryza_sativa_mirbase21_21nt.art.fq.gem.mod.bam.20	GEM.mod	20	0.980746	0.546915	0.937024
Oryza_sativa_mirbase21_21nt.art.fq.gem.mod.bam.15	GEM.mod	15	0.98056	0.546915	0.936864
Oryza_sativa_mirbase21_21nt.art.fq.gem.mod.bam.30	GEM.mod	30	1	0	0
Oryza_sativa_mirbase21_21nt.art.fq.gnumap.j10.mer10.bam.4	GNUmap.j10.m10	4	0.978806	0.551841	0.936197
Oryza_sativa_mirbase21_21nt.art.fq.gnumap.j10.mer10.bam.5	GNUmap.j10.m10	5	0.979129	0.550037	0.936169
Oryza_sativa_mirbase21_21nt.art.fq.gnumap.j10.mer10.bam.10	GNUmap.j10.m10	10	0.980336	0.537575	0.935035
Oryza_sativa_mirbase21_21nt.art.fq.gnumap.j10.mer10.bam.20	GNUmap.j10.m10	20	0.980261	0.537575	0.934971
Oryza_sativa_mirbase21_21nt.art.fq.gnumap.j10.mer10.bam.25	GNUmap.j10.m10	25	0.980149	0.537575	0.934875
Oryza_sativa_mirbase21_21nt.art.fq.gnumap.j10.mer10.bam.15	GNUmap.j10.m10	15	0.980087	0.537575	0.934822
Oryza_sativa_mirbase21_21nt.art.fq.gnumap.j10.mer10.bam.30	GNUmap.j10.m10	30	0.980075	0.537575	0.934811
Oryza_sativa_mirbase21_21nt.art.fq.gnumap.j10.mer10.bam.3	GNUmap.j10.m10	3	0.948371	0.612537	0.91874
Oryza_sativa_mirbase21_21nt.art.fq.gnumap.j10.mer10.bam.2	GNUmap.j10.m10	2	0.931169	0.639279	0.906814
Oryza_sativa_mirbase21_21nt.art.fq.gnumap.j10.mer10.bam.1	GNUmap.j10.m10	1	0.889428	0.691157	0.874668
Oryza_sativa_mirbase21_21nt.art.fq.gnumap.j10.mer10.bam.0	GNUmap.j10.m10	0	0.86046	0.72143	0.850815
Oryza_sativa_mirbase21_21nt.art.fq.gnumap.j2.mer6.bam.4	GNUmap.j2.m6	4	0.979627	0.635323	0.949363
Oryza_sativa_mirbase21_21nt.art.fq.gnumap.j2.mer6.bam.5	GNUmap.j2.m6	5	0.980535	0.62454	0.948724
Oryza_sativa_mirbase21_21nt.art.fq.gnumap.j2.mer6.bam.25	GNUmap.j2.m6	25	0.983383	0.55658	0.940939
Oryza_sativa_mirbase21_21nt.art.fq.gnumap.j2.mer6.bam.30	GNUmap.j2.m6	30	0.983333	0.55658	0.940896
Oryza_sativa_mirbase21_21nt.art.fq.gnumap.j2.mer6.bam.10	GNUmap.j2.m6	10	0.983321	0.55658	0.940886
Oryza_sativa_mirbase21_21nt.art.fq.gnumap.j2.mer6.bam.20	GNUmap.j2.m6	20	0.983296	0.55658	0.940864
Oryza_sativa_mirbase21_21nt.art.fq.gnumap.j2.mer6.bam.15	GNUmap.j2.m6	15	0.983147	0.55658	0.940736
Oryza_sativa_mirbase21_21nt.art.fq.gnumap.j2.mer6.bam.3	GNUmap.j2.m6	3	0.95398	0.692998	0.933305
Oryza_sativa_mirbase21_21nt.art.fq.gnumap.j2.mer6.bam.2	GNUmap.j2.m6	2	0.939614	0.72092	0.923142
Oryza_sativa_mirbase21_21nt.art.fq.gnumap.j2.mer6.bam.1	GNUmap.j2.m6	1	0.913619	0.756965	0.902631
Oryza_sativa_mirbase21_21nt.art.fq.gnumap.j2.mer6.bam.0	GNUmap.j2.m6	0	0.905771	0.767537	0.896276
Oryza_sativa_mirbase21_21nt.art.fq.gnumap.j3.mer10.bam.4	GNUmap.j3.m10	4	0.976206	0.607687	0.942582
Oryza_sativa_mirbase21_21nt.art.fq.gnumap.j3.mer10.bam.5	GNUmap.j3.m10	5	0.977289	0.598433	0.942201
Oryza_sativa_mirbase21_21nt.art.fq.gnumap.j3.mer10.bam.25	GNUmap.j3.m10	25	0.980037	0.543296	0.935787
Oryza_sativa_mirbase21_21nt.art.fq.gnumap.j3.mer10.bam.30	GNUmap.j3.m10	30	0.979789	0.543296	0.935574
Oryza_sativa_mirbase21_21nt.art.fq.gnumap.j3.mer10.bam.10	GNUmap.j3.m10	10	0.979776	0.543296	0.935563
Oryza_sativa_mirbase21_21nt.art.fq.gnumap.j3.mer10.bam.20	GNUmap.j3.m10	20	0.979714	0.543296	0.93551
Oryza_sativa_mirbase21_21nt.art.fq.gnumap.j3.mer10.bam.15	GNUmap.j3.m10	15	0.97954	0.543296	0.93536
Oryza_sativa_mirbase21_21nt.art.fq.gnumap.j3.mer10.bam.3	GNUmap.j3.m10	3	0.950473	0.663669	0.92691
Oryza_sativa_mirbase21_21nt.art.fq.gnumap.j3.mer10.bam.2	GNUmap.j3.m10	2	0.935485	0.692177	0.916534
Oryza_sativa_mirbase21_21nt.art.fq.gnumap.j3.mer10.bam.1	GNUmap.j3.m10	1	0.90755	0.727674	0.894542
Oryza_sativa_mirbase21_21nt.art.fq.gnumap.j3.mer10.bam.0	GNUmap.j3.m10	0	0.898396	0.738022	0.887057
Oryza_sativa_mirbase21_21nt.art.fq.hisat.bam.10	HISAT.df	10	0.967649	0.582649	0.931445
Oryza_sativa_mirbase21_21nt.art.fq.hisat.bam.25	HISAT.df	25	0.967649	0.582649	0.931445
Oryza_sativa_mirbase21_21nt.art.fq.hisat.bam.4	HISAT.df	4	0.967649	0.582649	0.931445
Oryza_sativa_mirbase21_21nt.art.fq.hisat.bam.15	HISAT.df	15	0.967575	0.582649	0.93138
Oryza_sativa_mirbase21_21nt.art.fq.hisat.bam.2	HISAT.df	2	0.96755	0.582649	0.931358
Oryza_sativa_mirbase21_21nt.art.fq.hisat.bam.5	HISAT.df	5	0.96745	0.582649	0.931271
Oryza_sativa_mirbase21_21nt.art.fq.hisat.bam.3	HISAT.df	3	0.967413	0.582649	0.931239
Oryza_sativa_mirbase21_21nt.art.fq.hisat.bam.20	HISAT.df	20	0.967388	0.582649	0.931217
Oryza_sativa_mirbase21_21nt.art.fq.hisat.bam.30	HISAT.df	30	0.967214	0.582649	0.931065
Oryza_sativa_mirbase21_21nt.art.fq.hisat.bam.1	HISAT.df	1	0.863495	0.73903	0.855024
Oryza_sativa_mirbase21_21nt.art.fq.hisat.bam.0	HISAT.df	0	0.861779	0.740348	0.853544
Oryza_sativa_mirbase21_21nt.art.fq.hisat.vs.bam.15	HISAT.vs	15	0.967761	0.582649	0.931542
Oryza_sativa_mirbase21_21nt.art.fq.hisat.vs.bam.2	HISAT.vs	2	0.96755	0.582649	0.931358
Oryza_sativa_mirbase21_21nt.art.fq.hisat.vs.bam.5	HISAT.vs	5	0.967525	0.582649	0.931336
Oryza_sativa_mirbase21_21nt.art.fq.hisat.vs.bam.20	HISAT.vs	20	0.967363	0.582649	0.931195
Oryza_sativa_mirbase21_21nt.art.fq.hisat.vs.bam.3	HISAT.vs	3	0.967338	0.582649	0.931174
Oryza_sativa_mirbase21_21nt.art.fq.hisat.vs.bam.4	HISAT.vs	4	0.967289	0.582649	0.93113
Oryza_sativa_mirbase21_21nt.art.fq.hisat.vs.bam.30	HISAT.vs	30	0.967189	0.582649	0.931043
Oryza_sativa_mirbase21_21nt.art.fq.hisat.vs.bam.10	HISAT.vs	10	0.967164	0.582649	0.931022
Oryza_sativa_mirbase21_21nt.art.fq.hisat.vs.bam.25	HISAT.vs	25	0.967164	0.582649	0.931022
Oryza_sativa_mirbase21_21nt.art.fq.hisat.vs.bam.0	HISAT.vs	0	0.863172	0.740348	0.85483
Oryza_sativa_mirbase21_21nt.art.fq.hisat.vs.bam.1	HISAT.vs	1	0.862699	0.73903	0.85429
Oryza_sativa_mirbase21_21nt.art.fq.hisat.vsl.bam.30	HISAT.vsl	30	0.974104	0.575896	0.936032
Oryza_sativa_mirbase21_21nt.art.fq.hisat.vsl.bam.5	HISAT.vsl	5	0.974005	0.575896	0.935946
Oryza_sativa_mirbase21_21nt.art.fq.hisat.vsl.bam.4	HISAT.vsl	4	0.973993	0.575896	0.935935
Oryza_sativa_mirbase21_21nt.art.fq.hisat.vsl.bam.10	HISAT.vsl	10	0.97393	0.575896	0.935881
Oryza_sativa_mirbase21_21nt.art.fq.hisat.vsl.bam.3	HISAT.vsl	3	0.973881	0.575896	0.935838
Oryza_sativa_mirbase21_21nt.art.fq.hisat.vsl.bam.20	HISAT.vsl	20	0.973744	0.575896	0.935719
Oryza_sativa_mirbase21_21nt.art.fq.hisat.vsl.bam.15	HISAT.vsl	15	0.973731	0.575896	0.935708
Oryza_sativa_mirbase21_21nt.art.fq.hisat.vsl.bam.25	HISAT.vsl	25	0.973731	0.575896	0.935708
Oryza_sativa_mirbase21_21nt.art.fq.hisat.vsl.bam.2	HISAT.vsl	2	0.973669	0.575896	0.935654
Oryza_sativa_mirbase21_21nt.art.fq.hisat.vsl.bam.1	HISAT.vsl	1	0.870734	0.731368	0.861082
Oryza_sativa_mirbase21_21nt.art.fq.hisat.vsl.bam.0	HISAT.vsl	0	0.870187	0.732239	0.860649
Oryza_sativa_mirbase21_21nt.art.fqmos.mosaic.hs15.bam.15	Mosiak.df	15	0.959701	0.625037	0.930398
Oryza_sativa_mirbase21_21nt.art.fqmos.mosaic.hs15.bam.10	Mosiak.df	10	0.947326	0.638458	0.921114
Oryza_sativa_mirbase21_21nt.art.fqmos.mosaic.hs15.bam.5	Mosiak.df	5	0.947201	0.638458	0.921003
Oryza_sativa_mirbase21_21nt.art.fqmos.mosaic.hs15.bam.4	Mosiak.df	4	0.946779	0.638918	0.920683
Oryza_sativa_mirbase21_21nt.art.fqmos.mosaic.hs15.bam.3	Mosiak.df	3	0.944328	0.642948	0.918989
Oryza_sativa_mirbase21_21nt.art.fqmos.mosaic.hs15.bam.2	Mosiak.df	2	0.930846	0.660087	0.908915
Oryza_sativa_mirbase21_21nt.art.fqmos.mosaic.hs15.bam.20	Mosiak.df	20	0.976095	0.367537	0.889462
Oryza_sativa_mirbase21_21nt.art.fqmos.mosaic.hs15.bam.1	Mosiak.df	1	0.78694	0.857139	0.79075
Oryza_sativa_mirbase21_21nt.art.fqmos.mosaic.hs15.bam.0	Mosiak.df	0	0.786331	0.857662	0.790197
Oryza_sativa_mirbase21_21nt.art.fqmos.mosaic.hs15.bam.25	Mosiak.df	25	0.98056	0.177774	0.774758
Oryza_sativa_mirbase21_21nt.art.fqmos.mosaic.hs15.bam.30	Mosiak.df	30	0.982637	0.147289	0.73682
AlignmentResult2.txt:Oryza_sativa_mirbase21_21nt.art.fqmos.mosaic.hs13.bam.15	Mosiak.hs13	15	0.956667	0.628321	0.928136
AlignmentResult2.txt:Oryza_sativa_mirbase21_21nt.art.fqmos.mosaic.hs13.bam.10	Mosiak.hs13	10	0.946281	0.639005	0.920251
AlignmentResult2.txt:Oryza_sativa_mirbase21_21nt.art.fqmos.mosaic.hs13.bam.5	Mosiak.hs13	5	0.945759	0.639478	0.919843
AlignmentResult2.txt:Oryza_sativa_mirbase21_21nt.art.fqmos.mosaic.hs13.bam.4	Mosiak.hs13	4	0.943358	0.643346	0.918172
AlignmentResult2.txt:Oryza_sativa_mirbase21_21nt.art.fqmos.mosaic.hs13.bam.20	Mosiak.hs13	20	0.973308	0.441331	0.908865
AlignmentResult2.txt:Oryza_sativa_mirbase21_21nt.art.fqmos.mosaic.hs13.bam.3	Mosiak.hs13	3	0.929303	0.662077	0.907751
AlignmentResult2.txt:Oryza_sativa_mirbase21_21nt.art.fqmos.mosaic.hs13.bam.2	Mosiak.hs13	2	0.862674	0.762114	0.85603
AlignmentResult2.txt:Oryza_sativa_mirbase21_21nt.art.fqmos.mosaic.hs13.bam.25	Mosiak.hs13	25	0.982537	0.194167	0.793111
AlignmentResult2.txt:Oryza_sativa_mirbase21_21nt.art.fqmos.mosaic.hs13.bam.1	Mosiak.hs13	1	0.787152	0.857512	0.790969
AlignmentResult2.txt:Oryza_sativa_mirbase21_21nt.art.fqmos.mosaic.hs13.bam.0	Mosiak.hs13	0	0.787015	0.857512	0.790839
AlignmentResult2.txt:Oryza_sativa_mirbase21_21nt.art.fqmos.mosaic.hs13.bam.30	Mosiak.hs13	30	0.987363	0.143209	0.733151
Oryza_sativa_mirbase21_21nt.art.fqmos.mosaic.hs11.bam.20	Mosiak.hs11	20	0.972313	0.564229	0.932635
Oryza_sativa_mirbase21_21nt.art.fqmos.mosaic.hs11.bam.15	Mosiak.hs11	15	0.955622	0.613756	0.925304
Oryza_sativa_mirbase21_21nt.art.fqmos.mosaic.hs11.bam.10	Mosiak.hs11	10	0.943993	0.626144	0.916622
Oryza_sativa_mirbase21_21nt.art.fqmos.mosaic.hs11.bam.5	Mosiak.hs11	5	0.941231	0.629067	0.914536
Oryza_sativa_mirbase21_21nt.art.fqmos.mosaic.hs11.bam.4	Mosiak.hs11	4	0.930958	0.64459	0.907248
Oryza_sativa_mirbase21_21nt.art.fqmos.mosaic.hs11.bam.3	Mosiak.hs11	3	0.884502	0.713893	0.872241
Oryza_sativa_mirbase21_21nt.art.fqmos.mosaic.hs11.bam.2	Mosiak.hs11	2	0.793284	0.832251	0.795475
Oryza_sativa_mirbase21_21nt.art.fqmos.mosaic.hs11.bam.0	Mosiak.hs11	0	0.788035	0.837749	0.790795
Oryza_sativa_mirbase21_21nt.art.fqmos.mosaic.hs11.bam.1	Mosiak.hs11	1	0.787587	0.837749	0.790371
Oryza_sativa_mirbase21_21nt.art.fqmos.mosaic.hs11.bam.25	Mosiak.hs11	25	0.993271	0.110547	0.675829
Oryza_sativa_mirbase21_21nt.art.fqmos.mosaic.hs11.bam.30	Mosiak.hs11	30	0.998682	0.0191542	0.249161
Oryza_sativa_mirbase21_21nt.art.fq.olego.bam.10	OLego.df	10	0.972711	0.710162	0.952008
Oryza_sativa_mirbase21_21nt.art.fq.olego.bam.5	OLego.df	5	0.971231	0.718532	0.951546
Oryza_sativa_mirbase21_21nt.art.fq.olego.bam.4	OLego.df	4	0.971045	0.719254	0.951452
Oryza_sativa_mirbase21_21nt.art.fq.olego.bam.15	OLego.df	15	0.974776	0.686468	0.951275
Oryza_sativa_mirbase21_21nt.art.fq.olego.bam.1	OLego.df	1	0.970672	0.720498	0.951243
Oryza_sativa_mirbase21_21nt.art.fq.olego.bam.2	OLego.df	2	0.970572	0.719925	0.951094
Oryza_sativa_mirbase21_21nt.art.fq.olego.bam.3	OLego.df	3	0.970311	0.719664	0.950831
Oryza_sativa_mirbase21_21nt.art.fq.olego.bam.20	OLego.df	20	0.978582	0.630261	0.947771
Oryza_sativa_mirbase21_21nt.art.fq.olego.bam.25	OLego.df	25	0.984428	0.494714	0.93026
Oryza_sativa_mirbase21_21nt.art.fq.olego.bam.30	OLego.df	30	0.987065	0.477624	0.928791
Oryza_sativa_mirbase21_21nt.art.fq.olego.bam.0	OLego.df	0	0.769403	0.997102	0.779879
Oryza_sativa_mirbase21_21nt.art.fqsm.smalt.k12.s2.bam.30	SMALT.k12.s2	30	0.973818	0.617413	0.941837
Oryza_sativa_mirbase21_21nt.art.fqsm.smalt.k12.s2.bam.25	SMALT.k12.s2	25	0.967687	0.65454	0.941199
Oryza_sativa_mirbase21_21nt.art.fqsm.smalt.k12.s2.bam.20	SMALT.k12.s2	20	0.964005	0.673943	0.940202
Oryza_sativa_mirbase21_21nt.art.fqsm.smalt.k12.s2.bam.15	SMALT.k12.s2	15	0.962388	0.678234	0.939241
Oryza_sativa_mirbase21_21nt.art.fqsm.smalt.k12.s2.bam.10	SMALT.k12.s2	10	0.961928	0.679826	0.939007
Oryza_sativa_mirbase21_21nt.art.fqsm.smalt.k12.s2.bam.5	SMALT.k12.s2	5	0.961356	0.680236	0.93854
Oryza_sativa_mirbase21_21nt.art.fqsm.smalt.k12.s2.bam.4	SMALT.k12.s2	4	0.956928	0.689167	0.935546
Oryza_sativa_mirbase21_21nt.art.fqsm.smalt.k12.s2.bam.3	SMALT.k12.s2	3	0.913744	0.770821	0.903885
Oryza_sativa_mirbase21_21nt.art.fqsm.smalt.k12.s2.bam.2	SMALT.k12.s2	2	0.8925	0.801381	0.88657
Oryza_sativa_mirbase21_21nt.art.fqsm.smalt.k12.s2.bam.1	SMALT.k12.s2	1	0.835286	0.870535	0.83728
Oryza_sativa_mirbase21_21nt.art.fqsm.smalt.k12.s2.bam.0	SMALT.k12.s2	0	0.779975	0.928396	0.78738
Oryza_sativa_mirbase21_21nt.art.fqsm.smalt.k18.s3.bam.20	SMALT.k18.s3	20	0.981269	0.546915	0.937473
Oryza_sativa_mirbase21_21nt.art.fqsm.smalt.k18.s3.bam.25	SMALT.k18.s3	25	0.981206	0.546915	0.937419
Oryza_sativa_mirbase21_21nt.art.fqsm.smalt.k18.s3.bam.5	SMALT.k18.s3	5	0.981169	0.546915	0.937387
Oryza_sativa_mirbase21_21nt.art.fqsm.smalt.k18.s3.bam.30	SMALT.k18.s3	30	0.981082	0.546915	0.937313
Oryza_sativa_mirbase21_21nt.art.fqsm.smalt.k18.s3.bam.10	SMALT.k18.s3	10	0.981007	0.546915	0.937248
Oryza_sativa_mirbase21_21nt.art.fqsm.smalt.k18.s3.bam.4	SMALT.k18.s3	4	0.98092	0.546915	0.937174
Oryza_sativa_mirbase21_21nt.art.fqsm.smalt.k18.s3.bam.15	SMALT.k18.s3	15	0.980896	0.546915	0.937152
Oryza_sativa_mirbase21_21nt.art.fqsm.smalt.k18.s3.bam.3	SMALT.k18.s3	3	0.947998	0.611891	0.918325
Oryza_sativa_mirbase21_21nt.art.fqsm.smalt.k18.s3.bam.2	SMALT.k18.s3	2	0.931294	0.636132	0.90655
Oryza_sativa_mirbase21_21nt.art.fqsm.smalt.k18.s3.bam.1	SMALT.k18.s3	1	0.886356	0.691306	0.871885
Oryza_sativa_mirbase21_21nt.art.fqsm.smalt.k18.s3.bam.0	SMALT.k18.s3	0	0.839092	0.74056	0.832576
Oryza_sativa_mirbase21_21nt.art.fq.soap.df.bam.20	SOAP2.df	20	0.954415	0.57694	0.919045
Oryza_sativa_mirbase21_21nt.art.fq.soap.df.bam.4	SOAP2.df	4	0.954415	0.57694	0.919045
Oryza_sativa_mirbase21_21nt.art.fq.soap.df.bam.25	SOAP2.df	25	0.954366	0.57694	0.919001
Oryza_sativa_mirbase21_21nt.art.fq.soap.df.bam.30	SOAP2.df	30	0.954366	0.57694	0.919001
Oryza_sativa_mirbase21_21nt.art.fq.soap.df.bam.3	SOAP2.df	3	0.954328	0.57694	0.918969
Oryza_sativa_mirbase21_21nt.art.fq.soap.df.bam.15	SOAP2.df	15	0.954316	0.57694	0.918958
Oryza_sativa_mirbase21_21nt.art.fq.soap.df.bam.2	SOAP2.df	2	0.954266	0.57694	0.918914
Oryza_sativa_mirbase21_21nt.art.fq.soap.df.bam.5	SOAP2.df	5	0.954254	0.57694	0.918903
Oryza_sativa_mirbase21_21nt.art.fq.soap.df.bam.1	SOAP2.df	1	0.954216	0.57694	0.918871
Oryza_sativa_mirbase21_21nt.art.fq.soap.df.bam.10	SOAP2.df	10	0.954192	0.57694	0.918849
Oryza_sativa_mirbase21_21nt.art.fq.soap.df.bam.0	SOAP2.df	0	0.782201	0.80143	0.783307
Oryza_sativa_mirbase21_21nt.art.fq.soap.g4.bam.15	SOAP2.g4	15	0.95459	0.57694	0.919197
Oryza_sativa_mirbase21_21nt.art.fq.soap.g4.bam.5	SOAP2.g4	5	0.95459	0.57694	0.919197
Oryza_sativa_mirbase21_21nt.art.fq.soap.g4.bam.2	SOAP2.g4	2	0.954328	0.57694	0.918969
Oryza_sativa_mirbase21_21nt.art.fq.soap.g4.bam.10	SOAP2.g4	10	0.954316	0.57694	0.918958
Oryza_sativa_mirbase21_21nt.art.fq.soap.g4.bam.20	SOAP2.g4	20	0.954303	0.57694	0.918947
Oryza_sativa_mirbase21_21nt.art.fq.soap.g4.bam.3	SOAP2.g4	3	0.954229	0.57694	0.918882
Oryza_sativa_mirbase21_21nt.art.fq.soap.g4.bam.30	SOAP2.g4	30	0.954179	0.57694	0.918838
Oryza_sativa_mirbase21_21nt.art.fq.soap.g4.bam.4	SOAP2.g4	4	0.954154	0.57694	0.918817
Oryza_sativa_mirbase21_21nt.art.fq.soap.g4.bam.25	SOAP2.g4	25	0.954005	0.57694	0.918686
Oryza_sativa_mirbase21_21nt.art.fq.soap.g4.bam.1	SOAP2.g4	1	0.953905	0.57694	0.9186
Oryza_sativa_mirbase21_21nt.art.fq.soap.g4.bam.0	SOAP2.g4	0	0.783433	0.80143	0.784469
Oryza_sativa_mirbase21_21nt.art.fqstampy.df.stampy.bam.0	Stampy.df	0	0.929764	0.139988	0.69809
Oryza_sativa_mirbase21_21nt.art.fqstampy.df.stampy.bam.1	Stampy.df	1	0.948719	0.120597	0.675758
Oryza_sativa_mirbase21_21nt.art.fqstampy.df.stampy.bam.2	Stampy.df	2	0.958259	0.109975	0.659172
Oryza_sativa_mirbase21_21nt.art.fqstampy.df.stampy.bam.3	Stampy.df	3	0.972687	0.0900871	0.617068
Oryza_sativa_mirbase21_21nt.art.fqstampy.df.stampy.bam.4	Stampy.df	4	0.978097	0.0819279	0.595151
Oryza_sativa_mirbase21_21nt.art.fqstampy.df.stampy.bam.5	Stampy.df	5	0.978955	0.0809204	0.592298
Oryza_sativa_mirbase21_21nt.art.fqstampy.df.stampy.bam.10	Stampy.df	10	0.990012	0.0620025	0.526482
Oryza_sativa_mirbase21_21nt.art.fqstampy.df.stampy.bam.15	Stampy.df	15	0.99291	0.0472015	0.455764
Oryza_sativa_mirbase21_21nt.art.fqstampy.df.stampy.bam.20	Stampy.df	20	0.997624	0.0203358	0.260687
Oryza_sativa_mirbase21_21nt.art.fqstampy.df.stampy.bam.25	Stampy.df	25	0.999565	0.00457711	0.0724992
Oryza_sativa_mirbase21_21nt.art.fqstampy.df.stampy.bam.30	Stampy.df	30	1	0	0
Oryza_sativa_mirbase21_21nt.art.fqstampy.sens.stampy.bam.5	Stampy.sens	5	0.980286	0.613383	0.946966
Oryza_sativa_mirbase21_21nt.art.fqstampy.sens.stampy.bam.4	Stampy.sens	4	0.979515	0.617077	0.946803
Oryza_sativa_mirbase21_21nt.art.fqstampy.sens.stampy.bam.10	Stampy.sens	10	0.984963	0.533483	0.938255
Oryza_sativa_mirbase21_21nt.art.fqstampy.sens.stampy.bam.3	Stampy.sens	3	0.947799	0.685871	0.926975
Oryza_sativa_mirbase21_21nt.art.fqstampy.sens.stampy.bam.2	Stampy.sens	2	0.926082	0.763308	0.914609
Oryza_sativa_mirbase21_21nt.art.fqstampy.sens.stampy.bam.15	Stampy.sens	15	0.989391	0.402687	0.911289
Oryza_sativa_mirbase21_21nt.art.fqstampy.sens.stampy.bam.1	Stampy.sens	1	0.879092	0.825585	0.875753
Oryza_sativa_mirbase21_21nt.art.fqstampy.sens.stampy.bam.0	Stampy.sens	0	0.799353	0.91658	0.805413
Oryza_sativa_mirbase21_21nt.art.fqstampy.sens.stampy.bam.20	Stampy.sens	20	0.99551	0.17745	0.783138
Oryza_sativa_mirbase21_21nt.art.fqstampy.sens.stampy.bam.25	Stampy.sens	25	0.999104	0.0406343	0.418471
Oryza_sativa_mirbase21_21nt.art.fqstampy.sens.stampy.bam.30	Stampy.sens	30	1	0	0
Oryza_sativa_mirbase21_21nt.art.fq.STAR.bam.5	STAR.df	5	0.940187	0.674627	0.918909
Oryza_sativa_mirbase21_21nt.art.fq.STAR.bam.15	STAR.df	15	0.93995	0.674627	0.918697
Oryza_sativa_mirbase21_21nt.art.fq.STAR.bam.20	STAR.df	20	0.939938	0.674627	0.918685
Oryza_sativa_mirbase21_21nt.art.fq.STAR.bam.4	STAR.df	4	0.939776	0.674627	0.91854
Oryza_sativa_mirbase21_21nt.art.fq.STAR.bam.25	STAR.df	25	0.939751	0.674627	0.918518
Oryza_sativa_mirbase21_21nt.art.fq.STAR.bam.30	STAR.df	30	0.939701	0.674627	0.918473
Oryza_sativa_mirbase21_21nt.art.fq.STAR.bam.10	STAR.df	10	0.939627	0.674627	0.918406
Oryza_sativa_mirbase21_21nt.art.fq.STAR.bam.3	STAR.df	3	0.864739	0.791082	0.860028
Oryza_sativa_mirbase21_21nt.art.fq.STAR.bam.2	STAR.df	2	0.864428	0.791082	0.859739
Oryza_sativa_mirbase21_21nt.art.fq.STAR.bam.1	STAR.df	1	0.799689	0.871468	0.803582
Oryza_sativa_mirbase21_21nt.art.fq.STAR.bam.0	STAR.df	0	0.736281	0.943458	0.745916
Oryza_sativa_mirbase21_21nt.art.fq.STAR.ni.bam.25	STAR.ni	25	0.940062	0.67755	0.919115
Oryza_sativa_mirbase21_21nt.art.fq.STAR.ni.bam.4	STAR.ni	4	0.939925	0.67755	0.918992
Oryza_sativa_mirbase21_21nt.art.fq.STAR.ni.bam.30	STAR.ni	30	0.939876	0.67755	0.918947
Oryza_sativa_mirbase21_21nt.art.fq.STAR.ni.bam.15	STAR.ni	15	0.939851	0.67755	0.918925
Oryza_sativa_mirbase21_21nt.art.fq.STAR.ni.bam.5	STAR.ni	5	0.939789	0.67755	0.918869
Oryza_sativa_mirbase21_21nt.art.fq.STAR.ni.bam.20	STAR.ni	20	0.939677	0.67755	0.918768
Oryza_sativa_mirbase21_21nt.art.fq.STAR.ni.bam.10	STAR.ni	10	0.93954	0.67755	0.918645
Oryza_sativa_mirbase21_21nt.art.fq.STAR.ni.bam.3	STAR.ni	3	0.867139	0.791393	0.862285
Oryza_sativa_mirbase21_21nt.art.fq.STAR.ni.bam.2	STAR.ni	2	0.867065	0.791393	0.862215
Oryza_sativa_mirbase21_21nt.art.fq.STAR.ni.bam.1	STAR.ni	1	0.802475	0.870236	0.806168
Oryza_sativa_mirbase21_21nt.art.fq.STAR.ni.bam.0	STAR.ni	0	0.737948	0.942575	0.747493
Oryza_sativa_mirbase21_21nt.art.fq.subread.mir.bam.20	Subread.mir	20	0.977413	0.548358	0.934406
Oryza_sativa_mirbase21_21nt.art.fq.subread.mir.bam.30	Subread.mir	30	0.977388	0.548358	0.934385
Oryza_sativa_mirbase21_21nt.art.fq.subread.mir.bam.15	Subread.mir	15	0.977114	0.548358	0.93415
Oryza_sativa_mirbase21_21nt.art.fq.subread.mir.bam.4	Subread.mir	4	0.977065	0.548358	0.934107
Oryza_sativa_mirbase21_21nt.art.fq.subread.mir.bam.3	Subread.mir	3	0.976978	0.548358	0.934032
Oryza_sativa_mirbase21_21nt.art.fq.subread.mir.bam.10	Subread.mir	10	0.976965	0.548358	0.934021
Oryza_sativa_mirbase21_21nt.art.fq.subread.mir.bam.25	Subread.mir	25	0.976965	0.548358	0.934021
Oryza_sativa_mirbase21_21nt.art.fq.subread.mir.bam.2	Subread.mir	2	0.976915	0.548358	0.933978
Oryza_sativa_mirbase21_21nt.art.fq.subread.mir.bam.1	Subread.mir	1	0.976779	0.548358	0.933861
Oryza_sativa_mirbase21_21nt.art.fq.subread.mir.bam.5	Subread.mir	5	0.976679	0.548358	0.933775
Oryza_sativa_mirbase21_21nt.art.fq.subread.mir.bam.0	Subread.mir	0	0.840037	0.765771	0.835272

## Sheet: manMapQ
BamFile	Mapper	MapQ threshold	Total	Correct	incorrect genome	incorrect mir	Precision	Recall	F0.25
Homo_sapiens_mirbase21.fa_21nt.art.fqbb.bbmap.bam.10	BBMap.df	10	128980	32225	40	809	0.993418	0.256427	0.849755
Homo_sapiens_mirbase21.fa_21nt.art.fqbb.bbmap.bam.4	BBMap.df	4	128980	32220	40	823	0.993309	0.256497	0.849726
Homo_sapiens_mirbase21.fa_21nt.art.fqbb.bbmap.bam.5	BBMap.df	5	128980	32211	40	832	0.993239	0.256497	0.849678
Homo_sapiens_mirbase21.fa_21nt.art.fqbb.bbmap.bam.3	BBMap.df	3	128980	44238	9616	7117	0.870267	0.472717	0.829244
Homo_sapiens_mirbase21.fa_21nt.art.fqbb.bbmap.bam.15	BBMap.df	15	128980	27659	31	683	0.994464	0.21998	0.823846
Homo_sapiens_mirbase21.fa_21nt.art.fqbb.bbmap.bam.0	BBMap.df	0	128980	100449	19234	8816	0.782524	0.996271	0.792526
Homo_sapiens_mirbase21.fa_21nt.art.fqbb.bbmap.bam.1	BBMap.df	1	128980	100390	19234	8875	0.782067	0.996271	0.792085
Homo_sapiens_mirbase21.fa_21nt.art.fqbb.bbmap.bam.2	BBMap.df	2	128980	49394	17885	7323	0.804559	0.5784	0.78647
Homo_sapiens_mirbase21.fa_21nt.art.fqbb.bbmap.bam.20	BBMap.df	20	128980	22523	24	563	0.995449	0.179175	0.785064
Homo_sapiens_mirbase21.fa_21nt.art.fqbb.bbmap.bam.25	BBMap.df	25	128980	18256	17	427	0.996558	0.144984	0.740657
Homo_sapiens_mirbase21.fa_21nt.art.fqbb.bbmap.bam.30	BBMap.df	30	128980	13404	13	325	0.997379	0.106544	0.668558
Homo_sapiens_mirbase21.fa_21nt.art.fqbb.bbmap.k8.bam.10	BBMap.k8	10	128980	64293	874	1846	0.978911	0.519561	0.930518
Homo_sapiens_mirbase21.fa_21nt.art.fqbb.bbmap.k8.bam.4	BBMap.k8	4	128980	64312	902	1859	0.978594	0.520026	0.930336
Homo_sapiens_mirbase21.fa_21nt.art.fqbb.bbmap.k8.bam.5	BBMap.k8	5	128980	64295	902	1876	0.978462	0.520026	0.930224
Homo_sapiens_mirbase21.fa_21nt.art.fqbb.bbmap.k8.bam.15	BBMap.k8	15	128980	58726	729	1702	0.981152	0.474159	0.923092
Homo_sapiens_mirbase21.fa_21nt.art.fqbb.bbmap.k8.bam.20	BBMap.k8	20	128980	53716	641	1503	0.983377	0.43309	0.91499
Homo_sapiens_mirbase21.fa_21nt.art.fqbb.bbmap.k8.bam.25	BBMap.k8	25	128980	52813	391	1521	0.985176	0.424291	0.914095
Homo_sapiens_mirbase21.fa_21nt.art.fqbb.bbmap.k8.bam.30	BBMap.k8	30	128980	51194	290	1460	0.986432	0.410482	0.911224
Homo_sapiens_mirbase21.fa_21nt.art.fqbb.bbmap.k8.bam.3	BBMap.k8	3	128980	71811	9747	7607	0.865452	0.691309	0.852815
Homo_sapiens_mirbase21.fa_21nt.art.fqbb.bbmap.k8.bam.2	BBMap.k8	2	128980	72872	22261	7777	0.767111	0.797876	0.768855
Homo_sapiens_mirbase21.fa_21nt.art.fqbb.bbmap.k8.bam.0	BBMap.k8	0	128980	93606	26662	8492	0.727446	0.998294	0.739244
Homo_sapiens_mirbase21.fa_21nt.art.fqbb.bbmap.k8.bam.1	BBMap.k8	1	128980	93583	26662	8515	0.727268	0.998294	0.739071
Homo_sapiens_mirbase21.fa_21nt.art.fq.bowtie2.bam.25	Bowtie2.df	25	128980	94022	556	2615	0.975415	0.753551	0.958809
Homo_sapiens_mirbase21.fa_21nt.art.fq.bowtie2.bam.30	Bowtie2.df	30	128980	94015	556	2622	0.975361	0.753551	0.95876
Homo_sapiens_mirbase21.fa_21nt.art.fq.bowtie2.bam.10	Bowtie2.df	10	128980	96506	929	2686	0.971972	0.776252	0.957767
Homo_sapiens_mirbase21.fa_21nt.art.fq.bowtie2.bam.20	Bowtie2.df	20	128980	95389	906	2643	0.972484	0.76708	0.957404
Homo_sapiens_mirbase21.fa_21nt.art.fq.bowtie2.bam.15	Bowtie2.df	15	128980	95313	906	2719	0.971895	0.76708	0.956866
Homo_sapiens_mirbase21.fa_21nt.art.fq.bowtie2.bam.5	Bowtie2.df	5	128980	98479	1204	2786	0.969065	0.794457	0.956696
Homo_sapiens_mirbase21.fa_21nt.art.fq.bowtie2.bam.3	Bowtie2.df	3	128980	98465	1204	2800	0.968956	0.794457	0.956597
Homo_sapiens_mirbase21.fa_21nt.art.fq.bowtie2.bam.2	Bowtie2.df	2	128980	98457	1204	2808	0.968894	0.794457	0.95654
Homo_sapiens_mirbase21.fa_21nt.art.fq.bowtie2.bam.4	Bowtie2.df	4	128980	98449	1204	2816	0.968832	0.794457	0.956483
Homo_sapiens_mirbase21.fa_21nt.art.fq.bowtie2.bam.1	Bowtie2.df	1	128980	105272	10587	9158	0.846914	0.969274	0.85325
Homo_sapiens_mirbase21.fa_21nt.art.fq.bowtie2.bam.0	Bowtie2.df	0	128980	105274	10691	9245	0.845433	0.970771	0.851903
Homo_sapiens_mirbase21.fa_21nt.art.fq.bowtie2.bib.bam.30	Bowtie2.bib	30	128980	92194	791	2603	0.973686	0.741107	0.956037
Homo_sapiens_mirbase21.fa_21nt.art.fq.bowtie2.bib.bam.25	Bowtie2.bib	25	128980	92668	1336	2653	0.969073	0.749395	0.952646
Homo_sapiens_mirbase21.fa_21nt.art.fq.bowtie2.bib.bam.15	Bowtie2.bib	15	128980	93576	1561	2602	0.967724	0.757784	0.952206
Homo_sapiens_mirbase21.fa_21nt.art.fq.bowtie2.bib.bam.20	Bowtie2.bib	20	128980	92775	1513	2590	0.968189	0.751109	0.952004
Homo_sapiens_mirbase21.fa_21nt.art.fq.bowtie2.bib.bam.4	Bowtie2.bib	4	128980	94806	1845	2678	0.964933	0.770112	0.950784
Homo_sapiens_mirbase21.fa_21nt.art.fq.bowtie2.bib.bam.5	Bowtie2.bib	5	128980	94783	1845	2701	0.964754	0.770112	0.950621
Homo_sapiens_mirbase21.fa_21nt.art.fq.bowtie2.bib.bam.10	Bowtie2.bib	10	128980	94745	1841	2739	0.964491	0.770081	0.950377
Homo_sapiens_mirbase21.fa_21nt.art.fq.bowtie2.bib.bam.3	Bowtie2.bib	3	128980	94740	1845	2744	0.964421	0.770112	0.950316
Homo_sapiens_mirbase21.fa_21nt.art.fq.bowtie2.bib.bam.2	Bowtie2.bib	2	128980	94730	1851	2754	0.964297	0.770158	0.950207
Homo_sapiens_mirbase21.fa_21nt.art.fq.bowtie2.bib.bam.1	Bowtie2.bib	1	128980	101237	10985	8802	0.846589	0.938316	0.851485
Homo_sapiens_mirbase21.fa_21nt.art.fq.bowtie2.bib.bam.0	Bowtie2.bib	0	128980	101287	11150	8823	0.845147	0.940146	0.8502
Homo_sapiens_mirbase21.fa_21nt.art.fq.bowtie2.vs.bam.30	Bowtie2.vs	30	128980	94003	556	2634	0.975267	0.753551	0.958675
Homo_sapiens_mirbase21.fa_21nt.art.fq.bowtie2.vs.bam.25	Bowtie2.vs	25	128980	93980	556	2657	0.975089	0.753551	0.958513
Homo_sapiens_mirbase21.fa_21nt.art.fq.bowtie2.vs.bam.10	Bowtie2.vs	10	128980	96427	929	2765	0.97136	0.776252	0.957208
Homo_sapiens_mirbase21.fa_21nt.art.fq.bowtie2.vs.bam.15	Bowtie2.vs	15	128980	95336	906	2696	0.972073	0.76708	0.957029
Homo_sapiens_mirbase21.fa_21nt.art.fq.bowtie2.vs.bam.2	Bowtie2.vs	2	128980	98512	1204	2753	0.969321	0.794457	0.956931
Homo_sapiens_mirbase21.fa_21nt.art.fq.bowtie2.vs.bam.20	Bowtie2.vs	20	128980	95322	906	2710	0.971965	0.76708	0.95693
Homo_sapiens_mirbase21.fa_21nt.art.fq.bowtie2.vs.bam.5	Bowtie2.vs	5	128980	98507	1204	2758	0.969282	0.794457	0.956896
Homo_sapiens_mirbase21.fa_21nt.art.fq.bowtie2.vs.bam.4	Bowtie2.vs	4	128980	98462	1204	2803	0.968933	0.794457	0.956575
Homo_sapiens_mirbase21.fa_21nt.art.fq.bowtie2.vs.bam.3	Bowtie2.vs	3	128980	98389	1204	2876	0.968367	0.794457	0.956056
Homo_sapiens_mirbase21.fa_21nt.art.fq.bowtie2.vs.bam.1	Bowtie2.vs	1	128980	105284	10582	9151	0.847007	0.969274	0.853339
Homo_sapiens_mirbase21.fa_21nt.art.fq.bowtie2.vs.bam.0	Bowtie2.vs	0	128980	105295	10688	9227	0.845596	0.970771	0.852059
Homo_sapiens_mirbase21.fa_21nt.art.fq.bowtie2.vsl.bam.30	Bowtie2.vsl	30	128980	93111	800	2667	0.97312	0.748783	0.956267
Homo_sapiens_mirbase21.fa_21nt.art.fq.bowtie2.vsl.bam.25	Bowtie2.vsl	25	128980	93474	1257	2618	0.969957	0.75476	0.953957
Homo_sapiens_mirbase21.fa_21nt.art.fq.bowtie2.vsl.bam.20	Bowtie2.vsl	20	128980	93546	1274	2624	0.969778	0.755497	0.953864
Homo_sapiens_mirbase21.fa_21nt.art.fq.bowtie2.vsl.bam.15	Bowtie2.vsl	15	128980	94269	1389	2707	0.968243	0.762638	0.953128
Homo_sapiens_mirbase21.fa_21nt.art.fq.bowtie2.vsl.bam.3	Bowtie2.vsl	3	128980	95630	1736	2617	0.966251	0.775182	0.952441
Homo_sapiens_mirbase21.fa_21nt.art.fq.bowtie2.vsl.bam.4	Bowtie2.vsl	4	128980	95545	1736	2702	0.965592	0.775182	0.951839
Homo_sapiens_mirbase21.fa_21nt.art.fq.bowtie2.vsl.bam.5	Bowtie2.vsl	5	128980	95526	1736	2721	0.965444	0.775182	0.951704
Homo_sapiens_mirbase21.fa_21nt.art.fq.bowtie2.vsl.bam.2	Bowtie2.vsl	2	128980	95516	1736	2731	0.965367	0.775182	0.951633
Homo_sapiens_mirbase21.fa_21nt.art.fq.bowtie2.vsl.bam.10	Bowtie2.vsl	10	128980	95457	1736	2790	0.964909	0.775182	0.951215
Homo_sapiens_mirbase21.fa_21nt.art.fq.bowtie2.vsl.bam.1	Bowtie2.vsl	1	128980	102038	10896	8895	0.846558	0.944557	0.851756
Homo_sapiens_mirbase21.fa_21nt.art.fq.bowtie2.vsl.bam.0	Bowtie2.vsl	0	128980	102009	11035	8988	0.844759	0.946131	0.850117
Homo_sapiens_mirbase21.fa_21nt.art.fq.bwa.bam.3	BWA.df	3	128980	95978	942	2644	0.972197	0.771934	0.957584
Homo_sapiens_mirbase21.fa_21nt.art.fq.bwa.bam.4	BWA.df	4	128980	95904	924	2658	0.972228	0.771329	0.957557
Homo_sapiens_mirbase21.fa_21nt.art.fq.bwa.bam.10	BWA.df	10	128980	94807	735	2732	0.97312	0.761932	0.957508
Homo_sapiens_mirbase21.fa_21nt.art.fq.bwa.bam.5	BWA.df	5	128980	95804	903	2696	0.972096	0.770685	0.957379
Homo_sapiens_mirbase21.fa_21nt.art.fq.bwa.bam.2	BWA.df	2	128980	95930	957	2714	0.971538	0.77222	0.957008
Homo_sapiens_mirbase21.fa_21nt.art.fq.bwa.bam.1	BWA.df	1	128980	95934	967	2723	0.971391	0.772399	0.95689
Homo_sapiens_mirbase21.fa_21nt.art.fq.bwa.bam.15	BWA.df	15	128980	90535	459	2600	0.976283	0.725647	0.956843
Homo_sapiens_mirbase21.fa_21nt.art.fq.bwa.bam.20	BWA.df	20	128980	80421	224	2279	0.980594	0.642921	0.951206
Homo_sapiens_mirbase21.fa_21nt.art.fq.bwa.bam.25	BWA.df	25	128980	58507	95	1589	0.986944	0.466669	0.926203
Homo_sapiens_mirbase21.fa_21nt.art.fq.bwa.bam.30	BWA.df	30	128980	57846	43	1586	0.98737	0.461118	0.925255
Homo_sapiens_mirbase21.fa_21nt.art.fq.bwa.bam.0	BWA.df	0	128980	105047	14769	9118	0.814801	0.999643	0.823761
Homo_sapiens_mirbase21.fa_21nt.art.fq.bwa.bib.bam.10	BWA.bib	10	128980	94680	742	2632	0.973841	0.760226	0.958006
Homo_sapiens_mirbase21.fa_21nt.art.fq.bwa.bib.bam.2	BWA.bib	2	128980	95340	876	2652	0.972647	0.766537	0.957502
Homo_sapiens_mirbase21.fa_21nt.art.fq.bwa.bib.bam.5	BWA.bib	5	128980	95177	832	2689	0.972701	0.765219	0.957431
Homo_sapiens_mirbase21.fa_21nt.art.fq.bwa.bib.bam.15	BWA.bib	15	128980	93469	655	2686	0.974097	0.750581	0.957327
Homo_sapiens_mirbase21.fa_21nt.art.fq.bwa.bib.bam.1	BWA.bib	1	128980	95328	886	2675	0.972391	0.7667	0.957284
Homo_sapiens_mirbase21.fa_21nt.art.fq.bwa.bib.bam.3	BWA.bib	3	128980	95240	866	2732	0.972104	0.766305	0.956986
Homo_sapiens_mirbase21.fa_21nt.art.fq.bwa.bib.bam.4	BWA.bib	4	128980	95168	850	2750	0.972089	0.765762	0.956922
Homo_sapiens_mirbase21.fa_21nt.art.fq.bwa.bib.bam.20	BWA.bib	20	128980	90356	582	2478	0.976275	0.724267	0.956694
Homo_sapiens_mirbase21.fa_21nt.art.fq.bwa.bib.bam.25	BWA.bib	25	128980	73665	501	2023	0.980431	0.590704	0.943802
Homo_sapiens_mirbase21.fa_21nt.art.fq.bwa.bib.bam.30	BWA.bib	30	128980	54829	8	1486	0.988417	0.43668	0.920037
Homo_sapiens_mirbase21.fa_21nt.art.fq.bwa.bib.bam.0	BWA.bib	0	128980	103601	12656	8953	0.832462	0.970771	0.839498
Homo_sapiens_mirbase21.fa_21nt.art.fq.bwa.ng.bam.10	BWA.ng	10	128980	94894	701	2645	0.974058	0.761668	0.958339
Homo_sapiens_mirbase21.fa_21nt.art.fq.bwa.ng.bam.5	BWA.ng	5	128980	95820	869	2680	0.972484	0.770422	0.957709
Homo_sapiens_mirbase21.fa_21nt.art.fq.bwa.ng.bam.4	BWA.ng	4	128980	95890	890	2672	0.972383	0.771065	0.957675
Homo_sapiens_mirbase21.fa_21nt.art.fq.bwa.ng.bam.3	BWA.ng	3	128980	95944	908	2678	0.972197	0.77167	0.95756
Homo_sapiens_mirbase21.fa_21nt.art.fq.bwa.ng.bam.1	BWA.ng	1	128980	95971	933	2686	0.971941	0.772135	0.957368
Homo_sapiens_mirbase21.fa_21nt.art.fq.bwa.ng.bam.2	BWA.ng	2	128980	95945	923	2699	0.971918	0.771957	0.957331
Homo_sapiens_mirbase21.fa_21nt.art.fq.bwa.ng.bam.15	BWA.ng	15	128980	90568	425	2567	0.976803	0.725384	0.957285
Homo_sapiens_mirbase21.fa_21nt.art.fq.bwa.ng.bam.20	BWA.ng	20	128980	80366	191	2334	0.980423	0.642666	0.951022
Homo_sapiens_mirbase21.fa_21nt.art.fq.bwa.ng.bam.25	BWA.ng	25	128980	58544	64	1552	0.987471	0.466429	0.926584
Homo_sapiens_mirbase21.fa_21nt.art.fq.bwa.ng.bam.30	BWA.ng	30	128980	57893	12	1539	0.987975	0.460878	0.925698
Homo_sapiens_mirbase21.fa_21nt.art.fq.bwa.ng.bam.0	BWA.ng	0	128980	104915	14751	9209	0.814235	0.999186	0.823198
Homo_sapiens_mirbase21.fa_21nt.art.fq.gem.bam.20	GEM.df	20	128980	76548	413	2111	0.980431	0.613056	0.947048
Homo_sapiens_mirbase21.fa_21nt.art.fq.gem.bam.0	GEM.df	0	128980	76511	413	2148	0.980144	0.613056	0.946796
Homo_sapiens_mirbase21.fa_21nt.art.fq.gem.bam.15	GEM.df	15	128980	76505	413	2154	0.980098	0.613056	0.946755
Homo_sapiens_mirbase21.fa_21nt.art.fq.gem.bam.4	GEM.df	4	128980	76503	413	2156	0.980082	0.613056	0.946741
Homo_sapiens_mirbase21.fa_21nt.art.fq.gem.bam.1	GEM.df	1	128980	76501	413	2158	0.980067	0.613056	0.946728
Homo_sapiens_mirbase21.fa_21nt.art.fq.gem.bam.25	GEM.df	25	128980	76492	413	2167	0.979997	0.613056	0.946666
Homo_sapiens_mirbase21.fa_21nt.art.fq.gem.bam.3	GEM.df	3	128980	76492	413	2167	0.979997	0.613056	0.946666
Homo_sapiens_mirbase21.fa_21nt.art.fq.gem.bam.5	GEM.df	5	128980	76482	413	2177	0.979919	0.613056	0.946598
Homo_sapiens_mirbase21.fa_21nt.art.fq.gem.bam.2	GEM.df	2	128980	76472	413	2187	0.979842	0.613056	0.94653
Homo_sapiens_mirbase21.fa_21nt.art.fq.gem.bam.10	GEM.df	10	128980	76467	413	2192	0.979803	0.613056	0.946496
Homo_sapiens_mirbase21.fa_21nt.art.fq.gem.bam.30	GEM.df	30	128980	0	0	0	1	0	0
Homo_sapiens_mirbase21.fa_21nt.art.fq.gem.mod.bam.25	GEM.mod	25	128980	76549	413	2110	0.980439	0.613056	0.947054
Homo_sapiens_mirbase21.fa_21nt.art.fq.gem.mod.bam.10	GEM.mod	10	128980	76539	413	2120	0.980361	0.613056	0.946986
Homo_sapiens_mirbase21.fa_21nt.art.fq.gem.mod.bam.15	GEM.mod	15	128980	76528	413	2131	0.980276	0.613056	0.946911
Homo_sapiens_mirbase21.fa_21nt.art.fq.gem.mod.bam.2	GEM.mod	2	128980	76521	413	2138	0.980222	0.613056	0.946864
Homo_sapiens_mirbase21.fa_21nt.art.fq.gem.mod.bam.0	GEM.mod	0	128980	76485	413	2174	0.979943	0.613056	0.946619
Homo_sapiens_mirbase21.fa_21nt.art.fq.gem.mod.bam.3	GEM.mod	3	128980	76479	413	2180	0.979896	0.613056	0.946578
Homo_sapiens_mirbase21.fa_21nt.art.fq.gem.mod.bam.20	GEM.mod	20	128980	76473	413	2186	0.97985	0.613056	0.946537
Homo_sapiens_mirbase21.fa_21nt.art.fq.gem.mod.bam.1	GEM.mod	1	128980	76462	413	2197	0.979764	0.613056	0.946462
Homo_sapiens_mirbase21.fa_21nt.art.fq.gem.mod.bam.5	GEM.mod	5	128980	76456	413	2203	0.979718	0.613056	0.946421
Homo_sapiens_mirbase21.fa_21nt.art.fq.gem.mod.bam.4	GEM.mod	4	128980	76450	413	2209	0.979671	0.613056	0.94638
Homo_sapiens_mirbase21.fa_21nt.art.fq.gem.mod.bam.30	GEM.mod	30	128980	0	0	0	1	0	0
Homo_sapiens_mirbase21.fa_21nt.art.fq.gnumap.j10.mer10.bam.5	GNUmap.j10.m10	5	128629	81897	1583	2601	0.967561	0.667398	0.942623
Homo_sapiens_mirbase21.fa_21nt.art.fq.gnumap.j10.mer10.bam.4	GNUmap.j10.m10	4	128629	82515	1713	2590	0.966638	0.673112	0.942463
Homo_sapiens_mirbase21.fa_21nt.art.fq.gnumap.j10.mer10.bam.30	GNUmap.j10.m10	30	128629	73511	1514	2275	0.970623	0.599318	0.936494
Homo_sapiens_mirbase21.fa_21nt.art.fq.gnumap.j10.mer10.bam.20	GNUmap.j10.m10	20	128629	73481	1514	2305	0.970391	0.599318	0.93629
Homo_sapiens_mirbase21.fa_21nt.art.fq.gnumap.j10.mer10.bam.10	GNUmap.j10.m10	10	128629	73455	1514	2331	0.970189	0.599318	0.936113
Homo_sapiens_mirbase21.fa_21nt.art.fq.gnumap.j10.mer10.bam.15	GNUmap.j10.m10	15	128629	73430	1514	2356	0.969995	0.599318	0.935944
Homo_sapiens_mirbase21.fa_21nt.art.fq.gnumap.j10.mer10.bam.25	GNUmap.j10.m10	25	128629	73420	1514	2366	0.969918	0.599318	0.935876
Homo_sapiens_mirbase21.fa_21nt.art.fq.gnumap.j10.mer10.bam.3	GNUmap.j10.m10	3	128629	85468	2623	4344	0.945984	0.716661	0.928507
Homo_sapiens_mirbase21.fa_21nt.art.fq.gnumap.j10.mer10.bam.2	GNUmap.j10.m10	2	128629	86668	3118	5576	0.932594	0.739355	0.918473
Homo_sapiens_mirbase21.fa_21nt.art.fq.gnumap.j10.mer10.bam.1	GNUmap.j10.m10	1	128629	87290	4259	7349	0.910002	0.76677	0.900111
Homo_sapiens_mirbase21.fa_21nt.art.fq.gnumap.j10.mer10.bam.0	GNUmap.j10.m10	0	128629	87383	4546	7449	0.907001	0.770492	0.897646
Homo_sapiens_mirbase21.fa_21nt.art.fq.gnumap.j3.mer10.bam.5	GNUmap.j3.m10	5	133750	87346	502	2428	0.977283	0.699922	0.955022
Homo_sapiens_mirbase21.fa_21nt.art.fq.gnumap.j3.mer10.bam.4	GNUmap.j3.m10	4	133750	88755	655	2551	0.975143	0.712987	0.954499
Homo_sapiens_mirbase21.fa_21nt.art.fq.gnumap.j3.mer10.bam.20	GNUmap.j3.m10	20	133750	74331	448	1977	0.981199	0.5951	0.945128
Homo_sapiens_mirbase21.fa_21nt.art.fq.gnumap.j3.mer10.bam.10	GNUmap.j3.m10	10	133750	74284	448	2024	0.980834	0.5951	0.94481
Homo_sapiens_mirbase21.fa_21nt.art.fq.gnumap.j3.mer10.bam.15	GNUmap.j3.m10	15	133750	74284	448	2024	0.980834	0.5951	0.94481
Homo_sapiens_mirbase21.fa_21nt.art.fq.gnumap.j3.mer10.bam.30	GNUmap.j3.m10	30	133750	74278	448	2030	0.980788	0.5951	0.944769
Homo_sapiens_mirbase21.fa_21nt.art.fq.gnumap.j3.mer10.bam.25	GNUmap.j3.m10	25	133750	74260	448	2048	0.980648	0.5951	0.944648
Homo_sapiens_mirbase21.fa_21nt.art.fq.gnumap.j3.mer10.bam.3	GNUmap.j3.m10	3	133750	92510	1716	4029	0.955458	0.761785	0.94138
Homo_sapiens_mirbase21.fa_21nt.art.fq.gnumap.j3.mer10.bam.2	GNUmap.j3.m10	2	133750	93822	2169	5551	0.940146	0.787269	0.929528
Homo_sapiens_mirbase21.fa_21nt.art.fq.gnumap.j3.mer10.bam.1	GNUmap.j3.m10	1	133750	94804	3238	7251	0.918677	0.816351	0.911953
Homo_sapiens_mirbase21.fa_21nt.art.fq.gnumap.j3.mer10.bam.0	GNUmap.j3.m10	0	133750	94982	3470	7232	0.917026	0.819383	0.910642
Homo_sapiens_mirbase21.fa_21nt.art.fq.gnumap.j3.mer6.bam.5	GNUmap.j3.m6	5	133750	87318	502	2456	0.977066	0.699922	0.954826
Homo_sapiens_mirbase21.fa_21nt.art.fq.gnumap.j3.mer6.bam.4	GNUmap.j3.m6	4	133750	88795	655	2511	0.975454	0.712987	0.954778
Homo_sapiens_mirbase21.fa_21nt.art.fq.gnumap.j3.mer6.bam.15	GNUmap.j3.m6	15	133750	74327	448	1981	0.981168	0.5951	0.945101
Homo_sapiens_mirbase21.fa_21nt.art.fq.gnumap.j3.mer6.bam.30	GNUmap.j3.m6	30	133750	74327	448	1981	0.981168	0.5951	0.945101
Homo_sapiens_mirbase21.fa_21nt.art.fq.gnumap.j3.mer6.bam.20	GNUmap.j3.m6	20	133750	74317	448	1991	0.98109	0.5951	0.945034
Homo_sapiens_mirbase21.fa_21nt.art.fq.gnumap.j3.mer6.bam.10	GNUmap.j3.m6	10	133750	74311	448	1997	0.981044	0.5951	0.944993
Homo_sapiens_mirbase21.fa_21nt.art.fq.gnumap.j3.mer6.bam.25	GNUmap.j3.m6	25	133750	74293	448	2015	0.980904	0.5951	0.944871
Homo_sapiens_mirbase21.fa_21nt.art.fq.gnumap.j3.mer6.bam.3	GNUmap.j3.m6	3	133750	92585	1686	3984	0.95604	0.761785	0.941911
Homo_sapiens_mirbase21.fa_21nt.art.fq.gnumap.j3.mer6.bam.2	GNUmap.j3.m6	2	133750	93959	2161	5422	0.941208	0.787269	0.930505
Homo_sapiens_mirbase21.fa_21nt.art.fq.gnumap.j3.mer6.bam.1	GNUmap.j3.m6	1	133750	94820	3225	7248	0.918801	0.816351	0.912068
Homo_sapiens_mirbase21.fa_21nt.art.fq.gnumap.j3.mer6.bam.0	GNUmap.j3.m6	0	133750	94937	3457	7290	0.916677	0.819383	0.910319
Homo_sapiens_mirbase21.fa_21nt.art.fq.hisat.bam.2	HISAT.df	2	157044	78563	2026	2209	0.967165	0.641944	0.939177
Homo_sapiens_mirbase21.fa_21nt.art.fq.hisat.bam.15	HISAT.df	15	157044	78545	2026	2227	0.967026	0.641944	0.939053
Homo_sapiens_mirbase21.fa_21nt.art.fq.hisat.bam.4	HISAT.df	4	157044	78543	2026	2229	0.96701	0.641944	0.939039
Homo_sapiens_mirbase21.fa_21nt.art.fq.hisat.bam.5	HISAT.df	5	157044	78541	2026	2231	0.966995	0.641944	0.939026
Homo_sapiens_mirbase21.fa_21nt.art.fq.hisat.bam.20	HISAT.df	20	157044	78517	2026	2255	0.966809	0.641944	0.93886
Homo_sapiens_mirbase21.fa_21nt.art.fq.hisat.bam.25	HISAT.df	25	157044	78516	2026	2256	0.966801	0.641944	0.938854
Homo_sapiens_mirbase21.fa_21nt.art.fq.hisat.bam.30	HISAT.df	30	157044	78500	2026	2272	0.966677	0.641944	0.938743
Homo_sapiens_mirbase21.fa_21nt.art.fq.hisat.bam.3	HISAT.df	3	157044	78493	2026	2279	0.966623	0.641944	0.938695
Homo_sapiens_mirbase21.fa_21nt.art.fq.hisat.bam.10	HISAT.df	10	157044	78475	2026	2297	0.966483	0.641944	0.938571
Homo_sapiens_mirbase21.fa_21nt.art.fq.hisat.bam.0	HISAT.df	0	157044	83662	6220	6841	0.898736	0.749907	0.888365
Homo_sapiens_mirbase21.fa_21nt.art.fq.hisat.bam.1	HISAT.df	1	157044	83552	6280	6810	0.898511	0.749279	0.888107
Homo_sapiens_mirbase21.fa_21nt.art.fq.hisat.vs.bam.10	HISAT.vs	10	157044	78540	2026	2232	0.966987	0.641944	0.939019
Homo_sapiens_mirbase21.fa_21nt.art.fq.hisat.vs.bam.30	HISAT.vs	30	157044	78520	2026	2252	0.966832	0.641944	0.938881
Homo_sapiens_mirbase21.fa_21nt.art.fq.hisat.vs.bam.4	HISAT.vs	4	157044	78519	2026	2253	0.966824	0.641944	0.938874
Homo_sapiens_mirbase21.fa_21nt.art.fq.hisat.vs.bam.5	HISAT.vs	5	157044	78516	2026	2256	0.966801	0.641944	0.938854
Homo_sapiens_mirbase21.fa_21nt.art.fq.hisat.vs.bam.3	HISAT.vs	3	157044	78501	2026	2271	0.966685	0.641944	0.93875
Homo_sapiens_mirbase21.fa_21nt.art.fq.hisat.vs.bam.20	HISAT.vs	20	157044	78493	2026	2279	0.966623	0.641944	0.938695
Homo_sapiens_mirbase21.fa_21nt.art.fq.hisat.vs.bam.15	HISAT.vs	15	157044	78492	2026	2280	0.966615	0.641944	0.938688
Homo_sapiens_mirbase21.fa_21nt.art.fq.hisat.vs.bam.2	HISAT.vs	2	157044	78483	2026	2289	0.966545	0.641944	0.938626
Homo_sapiens_mirbase21.fa_21nt.art.fq.hisat.vs.bam.25	HISAT.vs	25	157044	78466	2026	2306	0.966413	0.641944	0.938509
Homo_sapiens_mirbase21.fa_21nt.art.fq.hisat.vs.bam.1	HISAT.vs	1	157044	83655	6206	6781	0.89931	0.749279	0.888841
Homo_sapiens_mirbase21.fa_21nt.art.fq.hisat.vs.bam.0	HISAT.vs	0	157044	83568	6213	6942	0.898007	0.749907	0.887695
Homo_sapiens_mirbase21.fa_21nt.art.fq.hisat.vsl.bam.15	HISAT.vsl	15	156923	78576	1245	2177	0.973469	0.635742	0.943971
Homo_sapiens_mirbase21.fa_21nt.art.fq.hisat.vsl.bam.2	HISAT.vsl	2	156923	78538	1245	2215	0.973174	0.635742	0.94371
Homo_sapiens_mirbase21.fa_21nt.art.fq.hisat.vsl.bam.3	HISAT.vsl	3	156923	78529	1245	2224	0.973104	0.635742	0.943648
Homo_sapiens_mirbase21.fa_21nt.art.fq.hisat.vsl.bam.30	HISAT.vsl	30	156923	78523	1245	2230	0.973058	0.635742	0.943607
Homo_sapiens_mirbase21.fa_21nt.art.fq.hisat.vsl.bam.4	HISAT.vsl	4	156923	78519	1245	2234	0.973027	0.635742	0.94358
Homo_sapiens_mirbase21.fa_21nt.art.fq.hisat.vsl.bam.5	HISAT.vsl	5	156923	78485	1245	2268	0.972763	0.635742	0.943346
Homo_sapiens_mirbase21.fa_21nt.art.fq.hisat.vsl.bam.25	HISAT.vsl	25	156923	78465	1245	2288	0.972608	0.635742	0.943209
Homo_sapiens_mirbase21.fa_21nt.art.fq.hisat.vsl.bam.20	HISAT.vsl	20	156923	78453	1245	2300	0.972515	0.635742	0.943127
Homo_sapiens_mirbase21.fa_21nt.art.fq.hisat.vsl.bam.10	HISAT.vsl	10	156923	78439	1245	2314	0.972407	0.635742	0.943031
Homo_sapiens_mirbase21.fa_21nt.art.fq.hisat.vsl.bam.1	HISAT.vsl	1	156923	83664	5275	6814	0.906272	0.742386	0.894655
Homo_sapiens_mirbase21.fa_21nt.art.fq.hisat.vsl.bam.0	HISAT.vsl	0	156923	83605	5418	6817	0.90514	0.743061	0.893674
Homo_sapiens_mirbase21.fa_21nt.art.fqmos.mosaic.hs11.bam.20	Mosiak.hs11	20	128980	39609	2482	2412	0.962056	0.345038	0.870488
Homo_sapiens_mirbase21.fa_21nt.art.fqmos.mosaic.hs11.bam.15	Mosiak.hs11	15	128980	41294	5426	2692	0.93706	0.383098	0.863603
Homo_sapiens_mirbase21.fa_21nt.art.fqmos.mosaic.hs11.bam.10	Mosiak.hs11	10	128980	41392	9112	2694	0.908466	0.412452	0.848446
Homo_sapiens_mirbase21.fa_21nt.art.fqmos.mosaic.hs11.bam.5	Mosiak.hs11	5	128980	41447	10434	2661	0.898473	0.422872	0.84272
Homo_sapiens_mirbase21.fa_21nt.art.fqmos.mosaic.hs11.bam.4	Mosiak.hs11	4	128980	42130	11313	3412	0.885835	0.440805	0.836177
Homo_sapiens_mirbase21.fa_21nt.art.fqmos.mosaic.hs11.bam.3	Mosiak.hs11	3	128980	42824	12470	4434	0.868941	0.46308	0.826339
Homo_sapiens_mirbase21.fa_21nt.art.fqmos.mosaic.hs11.bam.2	Mosiak.hs11	2	128980	43523	15663	5373	0.836905	0.500535	0.80508
Homo_sapiens_mirbase21.fa_21nt.art.fqmos.mosaic.hs11.bam.1	Mosiak.hs11	1	128980	43548	15690	5353	0.836851	0.500783	0.80507
Homo_sapiens_mirbase21.fa_21nt.art.fqmos.mosaic.hs11.bam.0	Mosiak.hs11	0	128980	43428	15690	5473	0.83592	0.500783	0.80426
Homo_sapiens_mirbase21.fa_21nt.art.fqmos.mosaic.hs11.bam.25	Mosiak.hs11	25	128980	6361	229	474	0.99455	0.0547682	0.494956
Homo_sapiens_mirbase21.fa_21nt.art.fqmos.mosaic.hs11.bam.30	Mosiak.hs11	30	128980	41	9	1	0.999922	0.00039541	0.00667971
Homo_sapiens_mirbase21.fa_21nt.art.fqmos.mosaic.hs13.bam.20	Mosiak.hs13	20	128980	78736	5161	2228	0.942712	0.667739	0.920416
Homo_sapiens_mirbase21.fa_21nt.art.fqmos.mosaic.hs13.bam.25	Mosiak.hs13	25	128980	50930	2773	1525	0.966677	0.42819	0.900092
Homo_sapiens_mirbase21.fa_21nt.art.fqmos.mosaic.hs13.bam.15	Mosiak.hs13	15	128980	83827	8842	2423	0.912661	0.737262	0.900065
Homo_sapiens_mirbase21.fa_21nt.art.fqmos.mosaic.hs13.bam.10	Mosiak.hs13	10	128980	84070	11507	2448	0.891805	0.760002	0.882799
Homo_sapiens_mirbase21.fa_21nt.art.fqmos.mosaic.hs13.bam.5	Mosiak.hs13	5	128980	84138	11620	2399	0.891309	0.761025	0.882422
Homo_sapiens_mirbase21.fa_21nt.art.fqmos.mosaic.hs13.bam.4	Mosiak.hs13	4	128980	84142	11920	2457	0.888533	0.763832	0.880081
Homo_sapiens_mirbase21.fa_21nt.art.fqmos.mosaic.hs13.bam.3	Mosiak.hs13	3	128980	85530	13866	3413	0.866033	0.797093	0.86165
Homo_sapiens_mirbase21.fa_21nt.art.fqmos.mosaic.hs13.bam.2	Mosiak.hs13	2	128980	89831	19763	7622	0.78768	0.908792	0.793904
Homo_sapiens_mirbase21.fa_21nt.art.fqmos.mosaic.hs13.bam.1	Mosiak.hs13	1	128980	90260	20980	7702	0.777624	0.922174	0.784861
Homo_sapiens_mirbase21.fa_21nt.art.fqmos.mosaic.hs13.bam.0	Mosiak.hs13	0	128980	90201	20980	7761	0.777167	0.922174	0.784423
Homo_sapiens_mirbase21.fa_21nt.art.fqmos.mosaic.hs13.bam.30	Mosiak.hs13	30	128980	12381	591	373	0.992526	0.103466	0.659285
Homo_sapiens_mirbase21.fa_21nt.art.fqmos.mosaic.hs15.bam.15	Mosiak.df	15	128980	84317	8157	2500	0.917375	0.736347	0.904297
Homo_sapiens_mirbase21.fa_21nt.art.fqmos.mosaic.hs15.bam.20	Mosiak.df	20	128980	60714	6310	1748	0.937525	0.533199	0.897492
Homo_sapiens_mirbase21.fa_21nt.art.fqmos.mosaic.hs15.bam.25	Mosiak.df	25	128980	53798	6067	1594	0.940603	0.4765	0.889633
Homo_sapiens_mirbase21.fa_21nt.art.fqmos.mosaic.hs15.bam.10	Mosiak.df	10	128980	84521	11000	2369	0.896348	0.758955	0.886904
Homo_sapiens_mirbase21.fa_21nt.art.fqmos.mosaic.hs15.bam.5	Mosiak.df	5	128980	84500	11001	2390	0.896178	0.758963	0.886747
Homo_sapiens_mirbase21.fa_21nt.art.fqmos.mosaic.hs15.bam.4	Mosiak.df	4	128980	84436	11067	2461	0.895116	0.759529	0.885814
Homo_sapiens_mirbase21.fa_21nt.art.fqmos.mosaic.hs15.bam.3	Mosiak.df	3	128980	84559	11310	2476	0.893115	0.762483	0.884204
Homo_sapiens_mirbase21.fa_21nt.art.fqmos.mosaic.hs15.bam.30	Mosiak.df	30	128980	46337	5481	1330	0.947193	0.412064	0.879971
Homo_sapiens_mirbase21.fa_21nt.art.fqmos.mosaic.hs15.bam.2	Mosiak.df	2	128980	86257	14121	3563	0.862893	0.805869	0.859317
Homo_sapiens_mirbase21.fa_21nt.art.fqmos.mosaic.hs15.bam.1	Mosiak.df	1	128980	90609	20730	7859	0.778345	0.924159	0.785637
Homo_sapiens_mirbase21.fa_21nt.art.fqmos.mosaic.hs15.bam.0	Mosiak.df	0	128980	90582	20732	7894	0.778059	0.924236	0.785365
Homo_sapiens_mirbase21.fa_21nt.art.fq.olego.bam.10	OLego.df	10	128980	94863	734	2676	0.973562	0.761924	0.95791
Homo_sapiens_mirbase21.fa_21nt.art.fq.olego.bam.5	OLego.df	5	128980	95801	902	2699	0.972081	0.770678	0.957364
Homo_sapiens_mirbase21.fa_21nt.art.fq.olego.bam.2	OLego.df	2	128980	95959	956	2685	0.971771	0.772213	0.95722
Homo_sapiens_mirbase21.fa_21nt.art.fq.olego.bam.15	OLego.df	15	128980	90575	458	2560	0.976601	0.72564	0.957129
Homo_sapiens_mirbase21.fa_21nt.art.fq.olego.bam.3	OLego.df	3	128980	95909	941	2713	0.97167	0.771926	0.957102
Homo_sapiens_mirbase21.fa_21nt.art.fq.olego.bam.4	OLego.df	4	128980	95837	923	2725	0.971717	0.771321	0.95709
Homo_sapiens_mirbase21.fa_21nt.art.fq.olego.bam.1	OLego.df	1	128980	95913	966	2744	0.971236	0.772391	0.956747
Homo_sapiens_mirbase21.fa_21nt.art.fq.olego.bam.20	OLego.df	20	128980	80363	223	2337	0.980152	0.642914	0.950814
Homo_sapiens_mirbase21.fa_21nt.art.fq.olego.bam.25	OLego.df	25	128980	58578	94	1518	0.987502	0.466661	0.926664
Homo_sapiens_mirbase21.fa_21nt.art.fq.olego.bam.30	OLego.df	30	128980	57905	42	1527	0.987835	0.46111	0.925638
Homo_sapiens_mirbase21.fa_21nt.art.fq.olego.bam.0	OLego.df	0	128980	105027	14763	9143	0.814653	0.999636	0.823619
Homo_sapiens_mirbase21.fa_21nt.art.fqsm.smalt.k12.s2.bam.30	SMALT.k12.s2	30	128980	78388	1445	2155	0.972089	0.635664	0.942739
Homo_sapiens_mirbase21.fa_21nt.art.fqsm.smalt.k12.s2.bam.25	SMALT.k12.s2	25	128980	83916	2768	2376	0.960118	0.690495	0.93856
Homo_sapiens_mirbase21.fa_21nt.art.fqsm.smalt.k12.s2.bam.20	SMALT.k12.s2	20	128980	86890	4888	2569	0.942185	0.731486	0.926487
Homo_sapiens_mirbase21.fa_21nt.art.fqsm.smalt.k12.s2.bam.15	SMALT.k12.s2	15	128980	87432	5426	2506	0.938502	0.73937	0.923866
Homo_sapiens_mirbase21.fa_21nt.art.fqsm.smalt.k12.s2.bam.10	SMALT.k12.s2	10	128980	87487	5512	2544	0.937541	0.740758	0.923116
Homo_sapiens_mirbase21.fa_21nt.art.fqsm.smalt.k12.s2.bam.5	SMALT.k12.s2	5	128980	87508	5533	2539	0.937417	0.741045	0.923029
Homo_sapiens_mirbase21.fa_21nt.art.fqsm.smalt.k12.s2.bam.4	SMALT.k12.s2	4	128980	88409	5858	2728	0.933432	0.752016	0.920371
Homo_sapiens_mirbase21.fa_21nt.art.fqsm.smalt.k12.s2.bam.3	SMALT.k12.s2	3	128980	92895	9090	4637	0.893573	0.826655	0.889338
Homo_sapiens_mirbase21.fa_21nt.art.fqsm.smalt.k12.s2.bam.2	SMALT.k12.s2	2	128980	93999	10595	5910	0.872034	0.856753	0.87112
Homo_sapiens_mirbase21.fa_21nt.art.fqsm.smalt.k12.s2.bam.1	SMALT.k12.s2	1	128980	95060	13661	8133	0.831028	0.905985	0.835092
Homo_sapiens_mirbase21.fa_21nt.art.fqsm.smalt.k12.s2.bam.0	SMALT.k12.s2	0	128980	95312	17362	8300	0.801039	0.937928	0.807976
Homo_sapiens_mirbase21.fa_21nt.art.fqsm.smalt.k18.s3.bam.5	SMALT.k18.s3	5	128980	76557	420	2101	0.980454	0.613103	0.947075
Homo_sapiens_mirbase21.fa_21nt.art.fqsm.smalt.k18.s3.bam.10	SMALT.k18.s3	10	128980	76535	420	2123	0.980284	0.613103	0.946925
Homo_sapiens_mirbase21.fa_21nt.art.fqsm.smalt.k18.s3.bam.25	SMALT.k18.s3	25	128980	76515	420	2143	0.980129	0.613103	0.946789
Homo_sapiens_mirbase21.fa_21nt.art.fqsm.smalt.k18.s3.bam.15	SMALT.k18.s3	15	128980	76514	420	2144	0.980121	0.613103	0.946782
Homo_sapiens_mirbase21.fa_21nt.art.fqsm.smalt.k18.s3.bam.30	SMALT.k18.s3	30	128980	76501	420	2157	0.98002	0.613103	0.946693
Homo_sapiens_mirbase21.fa_21nt.art.fqsm.smalt.k18.s3.bam.20	SMALT.k18.s3	20	128980	76484	420	2174	0.979888	0.613103	0.946577
Homo_sapiens_mirbase21.fa_21nt.art.fqsm.smalt.k18.s3.bam.4	SMALT.k18.s3	4	128980	76479	420	2179	0.97985	0.613103	0.946543
Homo_sapiens_mirbase21.fa_21nt.art.fqsm.smalt.k18.s3.bam.3	SMALT.k18.s3	3	128980	79781	1662	3974	0.956303	0.66225	0.931961
Homo_sapiens_mirbase21.fa_21nt.art.fqsm.smalt.k18.s3.bam.2	SMALT.k18.s3	2	128980	80658	2367	4997	0.942906	0.682447	0.922202
Homo_sapiens_mirbase21.fa_21nt.art.fqsm.smalt.k18.s3.bam.1	SMALT.k18.s3	1	128980	81576	4406	6837	0.912831	0.719639	0.89864
Homo_sapiens_mirbase21.fa_21nt.art.fqsm.smalt.k18.s3.bam.0	SMALT.k18.s3	0	128980	81690	7893	7026	0.884331	0.749023	0.875033
Homo_sapiens_mirbase21.fa_21nt.art.fq.soap.df.bam.10	SOAP2.df	10	111366	76845	7334	2235	0.92581	0.66998	0.905472
Homo_sapiens_mirbase21.fa_21nt.art.fq.soap.df.bam.5	SOAP2.df	5	111366	76845	7334	2235	0.92581	0.66998	0.905472
Homo_sapiens_mirbase21.fa_21nt.art.fq.soap.df.bam.25	SOAP2.df	25	111366	76839	7334	2241	0.925764	0.66998	0.90543
Homo_sapiens_mirbase21.fa_21nt.art.fq.soap.df.bam.15	SOAP2.df	15	111366	76838	7334	2242	0.925756	0.66998	0.905423
Homo_sapiens_mirbase21.fa_21nt.art.fq.soap.df.bam.30	SOAP2.df	30	111366	76832	7334	2248	0.925709	0.66998	0.905381
Homo_sapiens_mirbase21.fa_21nt.art.fq.soap.df.bam.4	SOAP2.df	4	111366	76832	7334	2248	0.925709	0.66998	0.905381
Homo_sapiens_mirbase21.fa_21nt.art.fq.soap.df.bam.3	SOAP2.df	3	111366	76811	7334	2269	0.925547	0.66998	0.905234
Homo_sapiens_mirbase21.fa_21nt.art.fq.soap.df.bam.1	SOAP2.df	1	111366	76789	7334	2291	0.925376	0.66998	0.905081
Homo_sapiens_mirbase21.fa_21nt.art.fq.soap.df.bam.20	SOAP2.df	20	111366	76778	7334	2302	0.925291	0.66998	0.905004
Homo_sapiens_mirbase21.fa_21nt.art.fq.soap.df.bam.2	SOAP2.df	2	111366	76765	7334	2315	0.92519	0.66998	0.904913
Homo_sapiens_mirbase21.fa_21nt.art.fq.soap.df.bam.0	SOAP2.df	0	111366	82119	21910	7337	0.773244	0.863436	0.778025
Homo_sapiens_mirbase21.fa_21nt.art.fq.soap.g4.bam.10	SOAP2.g4	10	111366	76864	7334	2216	0.925958	0.66998	0.905604
Homo_sapiens_mirbase21.fa_21nt.art.fq.soap.g4.bam.30	SOAP2.g4	30	111366	76839	7334	2241	0.925764	0.66998	0.90543
Homo_sapiens_mirbase21.fa_21nt.art.fq.soap.g4.bam.2	SOAP2.g4	2	111366	76833	7334	2247	0.925717	0.66998	0.905388
Homo_sapiens_mirbase21.fa_21nt.art.fq.soap.g4.bam.4	SOAP2.g4	4	111366	76833	7334	2247	0.925717	0.66998	0.905388
Homo_sapiens_mirbase21.fa_21nt.art.fq.soap.g4.bam.15	SOAP2.g4	15	111366	76832	7334	2248	0.925709	0.66998	0.905381
Homo_sapiens_mirbase21.fa_21nt.art.fq.soap.g4.bam.25	SOAP2.g4	25	111366	76824	7334	2256	0.925647	0.66998	0.905325
Homo_sapiens_mirbase21.fa_21nt.art.fq.soap.g4.bam.1	SOAP2.g4	1	111366	76812	7334	2268	0.925554	0.66998	0.905241
Homo_sapiens_mirbase21.fa_21nt.art.fq.soap.g4.bam.20	SOAP2.g4	20	111366	76811	7334	2269	0.925547	0.66998	0.905234
Homo_sapiens_mirbase21.fa_21nt.art.fq.soap.g4.bam.5	SOAP2.g4	5	111366	76786	7334	2294	0.925353	0.66998	0.90506
Homo_sapiens_mirbase21.fa_21nt.art.fq.soap.g4.bam.3	SOAP2.g4	3	111366	76765	7334	2315	0.92519	0.66998	0.904913
Homo_sapiens_mirbase21.fa_21nt.art.fq.soap.g4.bam.0	SOAP2.g4	0	111366	82181	21961	7224	0.773725	0.863436	0.778483
Homo_sapiens_mirbase21.fa_21nt.art.fq.stampy.bam.0	Stampy.df	0	128980	9806	1666	1183	0.977911	0.098116	0.640219
Homo_sapiens_mirbase21.fa_21nt.art.fq.stampy.bam.1	Stampy.df	1	128980	9730	1204	1113	0.982036	0.0934021	0.629651
Homo_sapiens_mirbase21.fa_21nt.art.fq.stampy.bam.2	Stampy.df	2	128980	9567	856	854	0.986742	0.0874322	0.614775
Homo_sapiens_mirbase21.fa_21nt.art.fq.stampy.bam.3	Stampy.df	3	128980	9396	735	701	0.988866	0.083982	0.605252
Homo_sapiens_mirbase21.fa_21nt.art.fq.stampy.bam.4	Stampy.df	4	128980	9260	626	599	0.990502	0.0812917	0.597439
Homo_sapiens_mirbase21.fa_21nt.art.fq.stampy.bam.5	Stampy.df	5	128980	8701	536	552	0.991565	0.0758955	0.579965
Homo_sapiens_mirbase21.fa_21nt.art.fq.stampy.bam.10	Stampy.df	10	128980	7275	342	431	0.994007	0.0623973	0.529219
Homo_sapiens_mirbase21.fa_21nt.art.fq.stampy.bam.15	Stampy.df	15	128980	3400	118	197	0.997558	0.0288029	0.334923
Homo_sapiens_mirbase21.fa_21nt.art.fq.stampy.bam.20	Stampy.df	20	128980	0	0	0	1	0	0
Homo_sapiens_mirbase21.fa_21nt.art.fq.stampy.bam.25	Stampy.df	25	128980	0	0	0	1	0	0
Homo_sapiens_mirbase21.fa_21nt.art.fq.stampy.bam.30	Stampy.df	30	128980	0	0	0	1	0	0
Homo_sapiens_mirbase21.fa_21nt.art.fq.sens.stampy.bam.4	Stampy.sens	4	128980	76297	233	2181	0.981284	0.610257	0.947401
Homo_sapiens_mirbase21.fa_21nt.art.fq.sens.stampy.bam.3	Stampy.sens	3	128980	78291	677	2864	0.972546	0.634455	0.942987
Homo_sapiens_mirbase21.fa_21nt.art.fq.sens.stampy.bam.5	Stampy.sens	5	128980	71099	162	1998	0.983253	0.567987	0.94271
Homo_sapiens_mirbase21.fa_21nt.art.fq.sens.stampy.bam.2	Stampy.sens	2	128980	80177	1366	3993	0.958451	0.663173	0.933989
Homo_sapiens_mirbase21.fa_21nt.art.fq.sens.stampy.bam.10	Stampy.sens	10	128980	58275	37	1577	0.987486	0.464328	0.926107
Homo_sapiens_mirbase21.fa_21nt.art.fq.sens.stampy.bam.1	Stampy.sens	1	128980	82153	3204	6229	0.926865	0.710079	0.910513
Homo_sapiens_mirbase21.fa_21nt.art.fq.sens.stampy.bam.0	Stampy.sens	0	128980	82922	6851	7182	0.8912	0.751706	0.881577
Homo_sapiens_mirbase21.fa_21nt.art.fq.sens.stampy.bam.15	Stampy.sens	15	128980	26100	4	708	0.99448	0.207877	0.813423
Homo_sapiens_mirbase21.fa_21nt.art.fq.sens.stampy.bam.20	Stampy.sens	20	128980	0	0	0	1	0	0
Homo_sapiens_mirbase21.fa_21nt.art.fq.sens.stampy.bam.25	Stampy.sens	25	128980	0	0	0	1	0	0
Homo_sapiens_mirbase21.fa_21nt.art.fq.sens.stampy.bam.30	Stampy.sens	30	128980	0	0	0	1	0	0
Homo_sapiens_mirbase21.fa_21nt.art.fq.STAR.bam.15	STAR.df	15	202410	84841	5589	2327	0.938626	0.719158	0.922074
Homo_sapiens_mirbase21.fa_21nt.art.fq.STAR.bam.20	STAR.df	20	202410	84821	5589	2347	0.938471	0.719158	0.921933
Homo_sapiens_mirbase21.fa_21nt.art.fq.STAR.bam.10	STAR.df	10	202410	84807	5589	2361	0.938363	0.719158	0.921834
Homo_sapiens_mirbase21.fa_21nt.art.fq.STAR.bam.5	STAR.df	5	202410	84780	5589	2388	0.938153	0.719158	0.921644
Homo_sapiens_mirbase21.fa_21nt.art.fq.STAR.bam.30	STAR.df	30	202410	84753	5589	2415	0.937944	0.719158	0.921454
Homo_sapiens_mirbase21.fa_21nt.art.fq.STAR.bam.25	STAR.df	25	202410	84722	5589	2446	0.937704	0.719158	0.921236
Homo_sapiens_mirbase21.fa_21nt.art.fq.STAR.bam.4	STAR.df	4	202410	84721	5589	2447	0.937696	0.719158	0.921229
Homo_sapiens_mirbase21.fa_21nt.art.fq.STAR.bam.3	STAR.df	3	202410	89234	13078	4456	0.864056	0.827787	0.861835
Homo_sapiens_mirbase21.fa_21nt.art.fq.STAR.bam.2	STAR.df	2	202410	89222	13070	4476	0.863963	0.827787	0.861748
Homo_sapiens_mirbase21.fa_21nt.art.fq.STAR.bam.1	STAR.df	1	202410	90884	19742	6587	0.795868	0.908769	0.801727
Homo_sapiens_mirbase21.fa_21nt.art.fq.STAR.bam.0	STAR.df	0	202410	91513	24881	7908	0.745782	0.963731	0.755837
Homo_sapiens_mirbase21.fa_21nt.art.fq.STAR.ni.bam.30	STAR.ni	30	202408	84924	5598	2352	0.938363	0.720065	0.921922
Homo_sapiens_mirbase21.fa_21nt.art.fq.STAR.ni.bam.15	STAR.ni	15	202408	84885	5598	2391	0.93806	0.720065	0.921647
Homo_sapiens_mirbase21.fa_21nt.art.fq.STAR.ni.bam.25	STAR.ni	25	202408	84874	5598	2402	0.937975	0.720065	0.92157
Homo_sapiens_mirbase21.fa_21nt.art.fq.STAR.ni.bam.4	STAR.ni	4	202408	84855	5598	2421	0.937828	0.720065	0.921436
Homo_sapiens_mirbase21.fa_21nt.art.fq.STAR.ni.bam.10	STAR.ni	10	202408	84850	5598	2426	0.937789	0.720065	0.921401
Homo_sapiens_mirbase21.fa_21nt.art.fq.STAR.ni.bam.20	STAR.ni	20	202408	84831	5598	2445	0.937641	0.720065	0.921267
Homo_sapiens_mirbase21.fa_21nt.art.fq.STAR.ni.bam.5	STAR.ni	5	202408	84819	5598	2457	0.937548	0.720065	0.921182
Homo_sapiens_mirbase21.fa_21nt.art.fq.STAR.ni.bam.3	STAR.ni	3	202408	89368	12981	4381	0.86539	0.827493	0.863065
Homo_sapiens_mirbase21.fa_21nt.art.fq.STAR.ni.bam.2	STAR.ni	2	202408	89307	13002	4421	0.864917	0.827493	0.862622
Homo_sapiens_mirbase21.fa_21nt.art.fq.STAR.ni.bam.1	STAR.ni	1	202408	91057	19584	6521	0.797604	0.908373	0.803367
Homo_sapiens_mirbase21.fa_21nt.art.fq.STAR.ni.bam.0	STAR.ni	0	202408	91576	24776	7935	0.746387	0.963615	0.756418
Homo_sapiens_mirbase21.fa_21nt.art.fq.subread.mir.bam.4	Subread.mir	4	178079	75351	2014	2036	0.9686	0.615607	0.936995
Homo_sapiens_mirbase21.fa_21nt.art.fq.subread.mir.bam.2	Subread.mir	2	178079	75347	2013	2041	0.968569	0.615607	0.936968
Homo_sapiens_mirbase21.fa_21nt.art.fq.subread.mir.bam.3	Subread.mir	3	178079	75337	2013	2051	0.968491	0.615607	0.9369
Homo_sapiens_mirbase21.fa_21nt.art.fq.subread.mir.bam.20	Subread.mir	20	178079	75329	2013	2059	0.968429	0.615607	0.936845
Homo_sapiens_mirbase21.fa_21nt.art.fq.subread.mir.bam.1	Subread.mir	1	178079	75318	2012	2071	0.968344	0.615607	0.93677
Homo_sapiens_mirbase21.fa_21nt.art.fq.subread.mir.bam.5	Subread.mir	5	178079	75316	2013	2072	0.968328	0.615607	0.936756
Homo_sapiens_mirbase21.fa_21nt.art.fq.subread.mir.bam.30	Subread.mir	30	178079	75313	2013	2075	0.968305	0.615607	0.936736
Homo_sapiens_mirbase21.fa_21nt.art.fq.subread.mir.bam.10	Subread.mir	10	178079	75301	2014	2086	0.968212	0.615607	0.936654
Homo_sapiens_mirbase21.fa_21nt.art.fq.subread.mir.bam.15	Subread.mir	15	178079	75265	2012	2124	0.967933	0.615607	0.936408
Homo_sapiens_mirbase21.fa_21nt.art.fq.subread.mir.bam.25	Subread.mir	25	178079	75259	2012	2130	0.967886	0.615607	0.936367
Homo_sapiens_mirbase21.fa_21nt.art.fq.subread.mir.bam.0	Subread.mir	0	178079	85025	8988	7431	0.872701	0.78651	0.867112
