# Supplementary material
Source: HighWire-hosted journal article supplement (doi:10.1101/rna.055509.115)
Supplement: Supplemental_Table_S3.xlsx [file Supplemental_Table_S3.xlsx]

## Sheet: MultiMapperCommands
Mapper	AlignmentCommand
BBMap.df	bbmap.sh -Xmx80g overwrite=false ambiguous=all qin=33 t=30 in=$FA out=$SAM ref=$REF2
BBMap.k8	bbmap.sh -Xmx80g overwrite=false ambiguous=all qin=33 t=30 k=8 in=$FA out=$SAM ref=$REF1
Bowtie1.best	bowtie -f -p10 --best -k100 -S $REF $FA
Bowtie1.beststrata	bowtie -f -p10 -k100 --best --strata -S $REF $FA
Bowtie1.df	bowtie -f -p10 -k100 -S $REF $FA
Bowtie1.tryhard	bowtie -f -p10 --tryhard --best -k100 -S $REF $FA
Bowtie2.bib	bowtie2 -k 100 -f --local -p 20 -D 20 -R 3 -N 0 -L 8 -i S,1,0.50 -x $REF $FA
Bowtie2.df	bowtie2 -k100 -f -p30 -x $REF $FA
Bowtie2.vs	bowtie2 -k 100 -f -p20 --end-to-end --very-sensitive -x $REF $FA
Bowtie2.vsl	bowtie2 -k 100 -f -p20 --local --very-sensitive-local -x $REF $FA
GNUmap.df	gnumap-plain -g $REF --save=$IDX -o $OUT -c 30 -k 2 $FA
GNUmap.j2.mer6	gnumap-plain -g $REF --save=$IDX -o $OUT -c 30 -j 2 -k 2 -m 6 $FA
HISAT.df	hisat -k 100 -f -p 30 -x $REF $FA
HISAT.vs	hisat -k 100 -f -p 30 --end-to-end --very-sensitive -x $REF $FA
HISAT.vsl	hisat -k 100 -f -p 30 --local --very-sensitive-local -x $REF $FA
MicroRazers.sl.16.se	micro_razers -sL 16 -sE -o ${FA}.razers.sl${SL}.se.pa.out -v $REF $FA &
MicroRazers.sl.18.se	micro_razers -sL 18 -sE -o ${FA}.razers.sl${SL}.se.pa.out -v $REF $FA &
Mosaik.df	MosaikAligner -om -p 30 -hs 15 -in $MOS -out $BAM -ia $IDX -j $J -annse $ANNSE -annpe $ANNPE
Mosaik.hs11	MosaikAligner -om -p 30 -hs 11 -in $MOS -out $BAM -ia $IDX -j $J -annse $ANNSE -annpe $ANNPE
Segemehl.df	segemehl.x -t 10 -r 0 -d $REF -i $IDX -q $FAZ
SOAP2.df	soap -r2 -p10 -a $FA -D $IDX -o /dev/stdout
SOAP2.g4	soap -r2 -p10 -g 4 -a $FA -D $IDX -o /dev/stdout
STAR.df	STAR genomeLoad LoadAndKeep --genomeDir $DIR --readFilesIn $FA --outFilterMultimapNmax 100--runThreadN 30 --sjdbGTFfile $GTF
STAR.ni	STAR genomeLoad LoadAndKeep --genomeDir $DIR --readFilesIn $FA --alignIntronMax 1 --outFilterMultimapNmax 100 --runThreadN 30 --sjdbGTFfile $GTF
Subread.mir	subread-align -B 100 -i $REF2 -n 35 -m 4 -M 3 -T 10 -I 0 -P 3 -r $FA
